# Supplementary material for: An aqueous and recyclable copper(i)-catalyzed route to α-sulfenylated carbonyl compounds from propargylic alcohols and aryl thiols
Source: Royal Society of Chemistry journal article supplement (doi:10.1039/c3gc41251b), 2013-01-01
Supplement: c3gc41251b.pdf [file c3gc41251b.pdf]

## Supporting Information

### **An aqueous and recyclable copper(I)-catalyzed route to $\alpha$ -sulfenylated carbonyl compounds from propargylic alcohols and aryl thiols**

Rahul A. Watile,<sup>a</sup> Srijit Biswas,<sup>a</sup> and Joseph S. M. Samec\*<sup>a</sup>

<sup>a</sup> Dept. of Chemistry, BMC, Uppsala University, Box 576, SE-751 23 Uppsala, Sweden, Fax: (+) 018-471 3818; E-mail addresses: [joseph.samec@kemi.uu.se](mailto:joseph.samec@kemi.uu.se)

| <b>Contents</b>                                                                                   | <b>Page No.</b> |
|---------------------------------------------------------------------------------------------------|-----------------|
| A. Checklist of characterization data of all compounds                                            | 2–4             |
| B. General considerations                                                                         | 4               |
| C. Table of solvent selection and optimization of reaction time                                   | 5               |
| D. Experimental procedures and spectroscopic data of all products                                 | 5–14            |
| E. Isolation and characterization of intermediate <b>4</b>                                        | 14–15           |
| F. Cu-catalyzed conversion of intermediate <b>4</b> to product <b>3d</b> in presence of <b>2a</b> | 15              |
| G. Large scale experiment                                                                         | 15–16           |
| H. Copies of NMR spectra of all products                                                          | 17–37           |
| I. Copies of NMR spectra of isolated intermediate <b>4</b>                                        | 38–39           |
| J. References                                                                                     | 40              |

### A. Checklist of characterization data of all compounds.

| Sr. No. | Compounds                                                                                        | Known / Unknown | IR | <sup>1</sup> H NMR | <sup>13</sup> C NMR | HRMS |
|---------|--------------------------------------------------------------------------------------------------|-----------------|----|--------------------|---------------------|------|
| 1       | 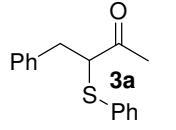<br><b>3a</b>   | Known           | -  | √                  | √                   | -    |
| 2       | <br><b>3b</b>   | Unknown         | √  | √                  | √                   | √    |
| 3       | <br><b>3c</b>   | Known           | √  | √                  | √                   | √    |
| 4       | <br><b>3d</b>   | Known           | -  | √                  | √                   | -    |
| 5       | <br><b>3e</b>  | Unknown         | √  | √                  | √                   | √    |
| 6       | <br><b>3f</b> | Unknown         | √  | √                  | √                   | √    |
| 7       | <br><b>3g</b> | Unknown         | √  | √                  | √                   | √    |
| 8       | <br><b>3h</b> | Unknown         | √  | √                  | √                   | √    |
| 9       | <br><b>3i</b> | Unknown         | √  | √                  | √                   | √    |
| 10      | <br><b>3j</b> | Unknown         | √  | √                  | √                   | √    |
| 11      | <br><b>3k</b> | Unknown         | √  | √                  | √                   | √    |

|    |                                                                                     |         |   |   |   |   |
|----|-------------------------------------------------------------------------------------|---------|---|---|---|---|
| 12 | 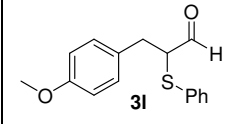   | Unknown | √ | √ | √ | √ |
| 13 |    | Known   | - | √ | √ | - |
| 14 |    | Unknown | √ | √ | √ | √ |
| 15 |    | Unknown | √ | √ | √ | √ |
| 16 |   | Unknown | √ | √ | √ | √ |
| 17 |  | Known   | √ | √ | √ | - |
| 18 |  | Known   | - | √ | √ | - |
| 19 |  | Known   | - | √ | √ | - |
| 20 |  | Unknown | √ | √ | √ | √ |
| 21 |  | Unknown | √ | √ | √ | √ |

|    |                                                                                            |       |   |   |   |   |
|----|--------------------------------------------------------------------------------------------|-------|---|---|---|---|
| 22 | 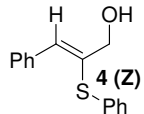<br>4 (Z) | Known | - | √ | √ | - |
| 23 | <br>4 (E) | Known | - | √ | √ | - |

## B. General considerations.

$^1\text{H}$  and  $^2\text{H}$  NMR spectra were recorded with a Varian 300 (300 MHz), Varian 400 (400 MHz) and Varian 500 (500 MHz) spectrometer as solutions in  $\text{CDCl}_3$ . Chemical shifts are expressed in parts per million (ppm,  $\delta$ ) and are referenced to  $\text{CHCl}_3$  ( $\delta = 7.26$  ppm) as an internal standard. All coupling constants are absolute values and are expressed in Hz. The description of the signals include: s = singlet, d = doublet, t = triplet, m = multiplet and dd = doublet of doublets, at = apparent triplet.  $^{13}\text{C}$  NMR spectra were recorded with a Varian 300 (75 MHz) and Varian 400 (100 MHz) spectrometer as solutions in  $\text{CDCl}_3$  with complete proton decoupling. Chemical shifts are expressed in parts per million (ppm,  $\delta$ ) and are referenced to  $\text{CDCl}_3$  ( $\delta = 77.0$  ppm) as an internal standard. IR spectra were recorded by a Perkin Elmer FT-IR Spectrometer. High-Resolution Mass Spectra (HRMS) were performed with a micrOTOF (Bruker) spectrometer by Na-formate. The molecular fragments are quoted as the relation between mass and charge ( $m/z$ ). The routine monitoring of reactions was performed with silica gel pre-coated Al plate, which was analyzed with iodine and/or uv light respectively. Solvents, reagents and chemicals were purchased from Aldrich. All reactions were executed with oven-dried glassware under nitrogen atmosphere. Solvent 1,2-Dichloroethane was dried by distilling over anhydrous phosphorus pentoxide prior to use.  $\text{NaBD}_4$  98 atom % D 90% (CP) purchased from Aldrich was used for reduction of aldehyde or ketone to prepare alcohols having deuterium at the hydriodic position.

### C. Table of solvent selection and optimization of reaction time.<sup>a</sup>

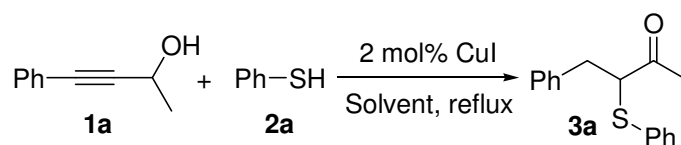

| Entry | Solvent            | Time (h) | Yield (%) <sup>b</sup> |
|-------|--------------------|----------|------------------------|
| 1     | Water              | 48       | 97                     |
| 2     | Acetonitrile       | 48       | 15                     |
| 3     | Toluene            | 48       | 40                     |
| 4     | Nitromethane       | 48       | 60                     |
| 5     | 1,2-Dichloroethane | 48       | 90                     |
| 6     | Water              | 60       | 97                     |
| 7     | Water              | 36       | 82                     |

<sup>a</sup> Reaction conditions: **1a** (1 mmol), **2a** (1.5 mmol) and CuI (2 mol%), at reflux in 2.0 mL solvent. <sup>b</sup> Conversion based on <sup>1</sup>H NMR analysis.

**D. Experimental procedures for the synthesis of all compounds including their spectroscopic data are provided below.**

#### 4-Phenyl-3-(phenylthio)butan-2-one (**3a**):<sup>1</sup>

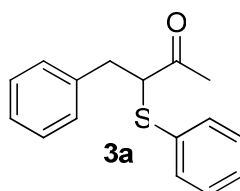

At first, the catalyst CuI (4 mg, 2 mol%) was weighed and transferred to a 5 mL vial containing a magnet under nitrogen atmosphere. The cap of the vial was closed tightly. 2.0 mL of degassed water followed by alcohol **1a** (145  $\mu$ L, 1 mmol) and benzenethiol **2a** (154  $\mu$ L, 1.5 mmol) were added to the vial by syringe and was stirred using a magnetic stirrer at reflux for 24 h. After allowing the mixture to cool to room temperature, the reaction mixture was extracted with ethyl acetate (3  $\times$  15 mL). The combined organic phase was washed with water and brine, dried with anhydrous Na<sub>2</sub>SO<sub>4</sub> and concentrated under reduced pressure. The residue was purified by silica-gel (100–200 mesh) column chromatography using 3% (v/v) ethyl acetate / pentane solution to afford the desired product **3a** (240 mg, 0.94 mmol, 94%). <sup>1</sup>H NMR (300 MHz, CDCl<sub>3</sub>):  $\delta$  = 2.20 (s, 3 H, H-1), 3.00 (dd,  $J$  = 6.9 Hz, 14.4 Hz, 1 H, H-4), 3.19 (dd,  $J$  = 8.4 Hz, 14.1 Hz, 1 H, H-4), 3.90 (dd,  $J$  = 6.9 Hz, 8.4 Hz, 1 H, H-3), 7.18–7.37

(m, 10 H, H-arom) ppm.  $^{13}\text{C}$  NMR (75 MHz,  $\text{CDCl}_3$ ):  $\delta = 28.1, 36.9, 59.0, 127.1, 128.5, 128.8, 129.4, 133.0, 133.3, 138.3, 204.5$  ppm.

**1-Phenyl-2-(phenylthio)pentan-3-one (3b):**

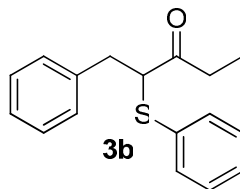

Alcohol **1b** (120  $\mu\text{L}$ , 1 mmol), benzenethiol **2a** (154  $\mu\text{L}$ , 1.5 mmol) and the catalyst CuI (4 mg, 2 mol%) in water (2.5 mL) were treated as described for **3a** to obtain **3b** as a yellowish oil (248 mg, 0.92 mmol, 92%). IR (Neat):  $\tilde{\nu} = 2962, 1705, 1439, 690$   $\text{cm}^{-1}$ .  $^1\text{H}$  NMR (400 MHz,  $\text{CDCl}_3$ ):  $\delta = 1.00$  (t,  $J = 7.2$  Hz, 3 H, H-1), 2.31–2.41 (m, 1 H, H-2), 2.60–2.68 (m, 1 H, H-2), 3.04 (dd,  $J = 6.4$  Hz, 13.6 Hz, 1 H, H-5), 3.23 (dd,  $J = 8.8, 14$  Hz, 1 H, H-5), 3.92–3.96 (m, 1 H, H-4), 7.20–7.40 (m, 10 H, H-arom) ppm.  $^{13}\text{C}$  NMR (100 MHz,  $\text{CDCl}_3$ ):  $\delta = 7.8, 34.1, 36.9, 57.8, 126.7, 127.5, 128.2, 128.5, 129.1, 132.8, 133.1, 138.2, 207.0$  ppm. HRMS: calcd. for  $\text{C}_{17}\text{H}_{18}\text{NaOS}$  293.0976; found 293.0971.

**4-Methyl-1-phenyl-2-(phenylthio)pentan-3-one (3c):<sup>1</sup>**

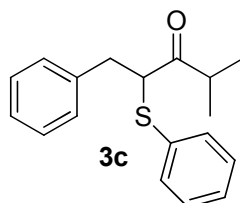

Alcohol **1c** (128  $\mu\text{L}$ , 1 mmol), benzenethiol **2a** (154  $\mu\text{L}$ , 1.5 mmol) and the catalyst CuI (4 mg, 2 mol%) in water (2.5 mL) were treated as described for **3a** to obtain **3c** as a yellowish oil (244 mg, 0.86 mmol, 86%). IR (Neat):  $\tilde{\nu} = 2969, 1707, 1439, 699$   $\text{cm}^{-1}$ .  $^1\text{H}$  NMR (300 MHz,  $\text{CDCl}_3$ ):  $\delta = 0.76$  (d,  $J = 6.9$  Hz, 3 H, H-5), 1.04 (d,  $J = 6.7$  Hz, 3 H,  $\text{CH}_3$ ), 2.70–2.79 (m, 1 H, H-4), 3.00 (dd,  $J = 5.7$  Hz, 13.8 Hz, 1 H, H-1), 3.22 (dd,  $J = 9.6$  Hz, 13.8 Hz, 1 H, H-1), 3.97–4.02 (dd,  $J = 5.7$  Hz, 9.6 Hz, 1 H, H-2), 7.42–7.38 (m, 2 H, H-arom), 7.14–7.35 (m, 8 H, H-arom) ppm.  $^{13}\text{C}$  NMR (100 MHz,  $\text{CDCl}_3$ ):  $\delta = 17.8, 18.3, 37.3, 39.3, 56.5, 126.5, 128.3, 129.0, 129.2, 132.8, 133.6, 138.5, 208.7$  ppm. HRMS: calcd. for  $\text{C}_{18}\text{H}_{20}\text{OSNa}$  307.1133; found 307.1115.

**3-Phenyl-2-(phenylthio)propanal (3d):<sup>1</sup>**

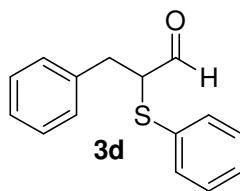

Alcohol **1d** (125  $\mu$ L, 1 mmol), benzenethiol **2a** (154  $\mu$ L, 1.5 mmol) and the catalyst CuI (4 mg, 2 mol%) in water (2.5 mL) were treated as described for **3a** to obtain **3d** as a reddish brown oil (232 mg, 0.96 mmol, 96%).  $^1\text{H}$  NMR (300 MHz,  $\text{CDCl}_3$ ):  $\delta$  = 3.00 (dd,  $J$  = 6.9 Hz, 14.4 Hz, 1 H, H-3), 3.22 (dd,  $J$  = 8.1 Hz, 14.4 Hz, 1 H, H-3), 3.81–3.87 (m, 1 H, H-2), 7.23–7.41 (m, 10 H, H-arom), 9.50 (d,  $J$  = 3.6 Hz, 1 H, H-1) ppm.  $^{13}\text{C}$  NMR (75 MHz,  $\text{CDCl}_3$ ):  $\delta$  = 34.4, 58.1, 127.1, 128.6, 128.8, 129.3, 129.3, 131.6, 133.4, 137.3, 194.2 ppm.

**3-(Phenylthio)-4-(p-tolyl)butan-2-one (3e):**

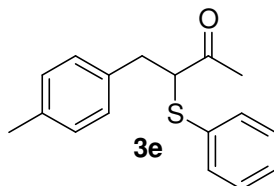

Alcohol **1e** (160 mg, 1 mmol), benzenethiol **2a** (154  $\mu$ L, 1.5 mmol) and the catalyst CuI (4 mg, 2 mol%) in water (2.5 mL) were treated as described for **3a** to obtain **3e** as a yellowish oil (224 mg, 0.83 mmol, 83%). IR (Neat):  $\tilde{\nu}$  = 2919, 1708, 1438, 805, 689  $\text{cm}^{-1}$ .  $^1\text{H}$  NMR (400 MHz,  $\text{CDCl}_3$ ):  $\delta$  = 2.22 (s, 3 H, H-1), 2.34 (s, 3 H, H-methyl), 2.30 (dd,  $J$  = 6.8 Hz, 14.4 Hz, 1 H, H-4), 3.17 (dd,  $J$  = 8.8 Hz, 14.1 Hz, 1 H, H-4), 3.92 (t,  $J$  = 6.9 Hz, 1 H, H-3), 7.11–7.34 (m, 9 H, H-arom) ppm.  $^{13}\text{C}$  NMR (100 MHz,  $\text{CDCl}_3$ ):  $\delta$  = 21.0, 27.7, 36.2, 58.8, 128.1, 128.9, 129.1, 129.2, 132.8, 132.8, 134.8, 136.3, 204.4 ppm. HRMS: calcd. for  $\text{C}_{17}\text{H}_{18}\text{NaOS}$  293.0976; found 293.0971.

**4-([1,1'-Biphenyl]-4-yl)-3-(phenylthio)butan-2-one (3f):**

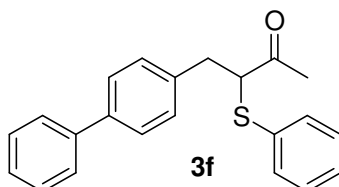

Alcohol **1f** (222 mg, 1 mmol), benzenethiol **2a** (154  $\mu$ L, 1.5 mmol) and the catalyst CuI (4 mg, 2 mol%) in water (2.5 mL) were treated as described for **3a** to obtain **3f** as a reddish brown oil (299 mg, 0.90 mmol, 90%). IR (Neat):  $\tilde{\nu}$  = 3053, 3031, 1707, 1486, 754, 687  $\text{cm}^{-1}$ .  $^1\text{H}$  NMR (400 MHz,  $\text{CDCl}_3$ ):  $\delta$  = 2.28 (s, 3 H, H-1), 3.09 (dd,  $J$  = 6.8 Hz, 14.4 Hz, 1 H, H-4),

3.27 (dd,  $J = 8.0$  Hz, 16 Hz, 1 H, H-4), 3.97–4.00 (m, 1 H, H-3), 7.28–7.62 (m, 14 H, H-arom) ppm.  $^{13}\text{C}$  NMR (100 MHz,  $\text{CDCl}_3$ ):  $\delta = 27.8, 36.2, 58.6, 126.1, 127.2, 127.1, 128.2, 128.7, 129.5, 132.6, 133, 137.0, 139.6, 140.7, 204.1$  ppm. HRMS: calcd. for  $\text{C}_{22}\text{H}_{20}\text{NaOS}$  355.1133; found 355.1127.

**4-(3, 4-Dichlorophenyl)-3-(phenylthio)butan-2-one (3g):**

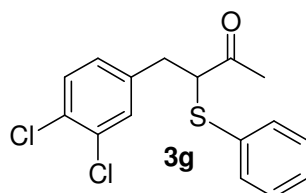

Alcohol **1g** (215 mg, 1 mmol), benzenethiol **2a** (154  $\mu\text{L}$ , 1.5 mmol) and the catalyst  $\text{CuI}$  (4 mg, 2 mol%) in water (2.5 mL) were treated as described for **3a** to obtain **3g** as a reddish brown oil (295 mg, 0.91 mmol, 91%). IR (Neat):  $\tilde{\nu} = 3059, 1705, 1471, 1132, 739, 689$   $\text{cm}^{-1}$ .  $^1\text{H}$  NMR (400 MHz,  $\text{CDCl}_3$ ):  $\delta = 2.28$  (s, 3 H, H-1), 2.92 (dd,  $J = 8$  Hz, 16 Hz, 1 H, H-4), 3.14 (dd,  $J = 8.0$  Hz, 16 Hz, 1 H, H-4), 3.82 (t,  $J = 7.2$ , 1 H, H-3), 7.28–7.37 (m, 8 H, H-arom) ppm.  $^{13}\text{C}$  NMR (100 MHz,  $\text{CDCl}_3$ ):  $\delta = 28, 35.4, 58.1, 128.6, 128.6, 129.2, 130.3, 130.7, 131.0, 131.8, 132.3, 133.4, 138.4, 203.3$  ppm. HRMS: calcd. for  $\text{C}_{16}\text{H}_{14}\text{Cl}_2\text{NaOS}$  347.0040; found 347.0035.

**4-(Naphthalen-1-yl)-3-(phenylthio)butan-2-one (3h):**

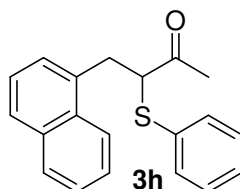

Alcohol **1h** (196 mg, 1 mmol), benzenethiol **2a** (154  $\mu\text{L}$ , 1.5 mmol) and the catalyst  $\text{AuCl}$  (5 mg, 2 mol%) in water (2.5 mL) were treated as described for **3a** to obtain **3h** as a reddish brown oil (287 mg, 0.95 mmol, 95%). IR (Neat):  $\tilde{\nu} = 3055, 1705, 1438, 1352, 775, 741$   $\text{cm}^{-1}$ .  $^1\text{H}$  NMR (400 MHz,  $\text{CDCl}_3$ ):  $\delta = 2.21$  (s, 3 H, H-1), 3.51 (dd,  $J = 5.6$  Hz, 14.4 Hz, 1 H, H-4), 3.67 (dd,  $J = 8.8$  Hz, 14.8 Hz, 1 H, H-4), 4.10–4.13 (m, 1 H, H-3), 7.28–7.55 (m, 9 H, H-arom), 7.77 (d, 1 H, H-arom), 7.88–7.95 (m, 2 H, H-arom) ppm.  $^{13}\text{C}$  NMR (100 MHz,  $\text{CDCl}_3$ ):  $\delta = 28.1, 33.7, 57.7, 123.1, 125.3, 125.6, 126.2, 126.6, 127.6, 128.3, 128.7, 129.1, 131.6, 132.6, 133.2, 133.9, 204.2$  ppm. HRMS: calcd. for  $\text{C}_{20}\text{H}_{18}\text{NaOS}$  329.0976; found 329.0971.



**4-(4-Acetylphenyl)-3-(phenylthio)butan-2-one (3i):**

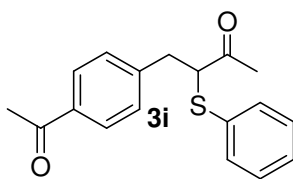

Alcohol **1i** (188 mg, 1 mmol), benzenethiol **2a** (154  $\mu$ L, 1.5 mmol) and the catalyst CuI (4 mg, 2 mol%) in water (2.5 mL) were treated as described for **3a** to obtain **3i** as a yellowish oil (253 mg, 0.85 mmol, 85%). IR (Neat):  $\tilde{\nu}$  = 2927, 1679, 1266, 820, 729  $\text{cm}^{-1}$ .  $^1\text{H}$  NMR (300 MHz,  $\text{CDCl}_3$ ):  $\delta$  = 2.24 (s, 3 H, H-1), 2.58 (s, 3 H, H-COCH<sub>3</sub>), 3.03 (dd,  $J$  = 6.9 Hz, 14.1 Hz, 1 H, H-4), 3.24 (dd,  $J$  = 8.1 Hz, 14.1 Hz, 1 H, H-4), 3.90 (dd,  $J$  = 6.9 Hz, 8.1 Hz, 1 H, H-3), 7.28–7.37 (m, 7 H, H-arom), 7.87–7.91 (m, 2 H, H-arom) ppm.  $^{13}\text{C}$  NMR (75 MHz,  $\text{CDCl}_3$ ):  $\delta$  = 26.5, 27.9, 36.3, 58.0, 128.5, 128.5, 129.1, 129.3, 132.0, 133.3, 135.7, 143.7, 197.6, 203.5 ppm. HRMS: calcd. for  $\text{C}_{18}\text{H}_{18}\text{NaO}_2\text{S}$  321.0925; found 321.0920.

**2-(Phenylthio)-3-(4-(trifluoromethyl)phenyl)propanal (3j):**

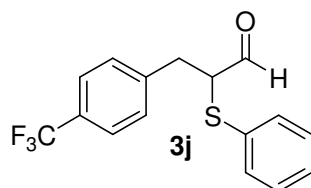

Alcohol **1j** (200 mg, 1 mmol), benzenethiol **2a** (154  $\mu$ L, 1.5 mmol) and the catalyst CuI (4 mg, 2 mol%) in water (2.5 mL) were treated as described for **3a** to obtain **3j** as a reddish brown oil (218 mg, 0.90 mmol, 90%). IR (Neat):  $\tilde{\nu}$  = 2988, 2901, 1717, 1323, 775, 1066  $\text{cm}^{-1}$ .  $^1\text{H}$  NMR (400 MHz,  $\text{CDCl}_3$ ):  $\delta$  = 3.01 (dd,  $J$  = 67.6 Hz, 14.4 Hz, 1 H, H-3), 3.27 (dd,  $J$  = 7.6 Hz, 14.4 Hz, 1 H, H-3), 3.80–3.84 (m, 1 H, H-2), 7.28–7.50 (m, 7 H, H-arom), 7.53–7.60 (m, 2 H, H-arom) 9.55 (d,  $J$  = 2.8 Hz, 1 H, H-1) ppm.  $^{13}\text{C}$  NMR (100 MHz,  $\text{CDCl}_3$ ):  $\delta$  = 33.8, 57.7, 125.4, 125.5, 125.5, 128.8, 129.3, 129.5, 130.7, 133.7, 141.4, 193.5 ppm. HRMS: calcd. for  $\text{C}_{16}\text{H}_{13}\text{F}_3\text{NaOS}$  333.0537; found 333.0531.

**3-(4-Acetylphenyl)-2-(phenylthio)propanal (3k):**

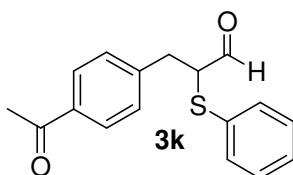

Alcohol **1k** (174 mg, 1 mmol), benzenethiol **2a** (154  $\mu$ L, 1.5 mmol) and the catalyst CuI (4 mg, 2 mol%) in water (2.5 mL) were treated as described for **3a** to obtain **3k** as a yellowish

oil (207 mg, 0.73 mmol, 73%). IR (Neat):  $\tilde{\nu}$  = 2959, 2929, 1720, 1683, 1267, 1073, 745  $\text{cm}^{-1}$ .  $^1\text{H}$  NMR (400 MHz,  $\text{CDCl}_3$ ):  $\delta$  = 2.60 (s, 3 H, H-COCH<sub>3</sub>), 3.01 (dd,  $J$  = 7.2 Hz, 14.4 Hz, 1 H, H-3), 3.26 (dd,  $J$  = 7.5 Hz, 14.4 Hz, 1 H, H-3), 3.80–3.86 (m, 1 H, H-2), 7.26–7.40 (m, 7 H, H-arom), 7.91–7.93 (m, 2 H, H-arom), 9.54 (d,  $J$  = 3.0 Hz, 1 H, H-1) ppm.  $^{13}\text{C}$  NMR (100 MHz,  $\text{CDCl}_3$ ):  $\delta$  = 26.6, 34.0, 57.6, 128.7, 128.7, 128.8, 129.0, 129.3, 129.4, 133.6, 135.9, 142.9, 193.6, 197.6 ppm. HRMS: calcd. for  $\text{C}_{17}\text{H}_{16}\text{NaO}_2\text{S}$  307.0769; found 307.0753.

### 3-(4-Methoxyphenyl)-2-(phenylthio)propanal (**3l**):

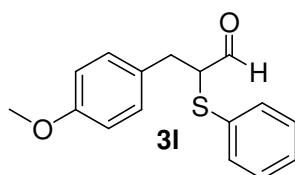

Alcohol **1l** (162 mg, 1 mmol), benzenethiol **2a** (154  $\mu\text{L}$ , 1.5 mmol) and the catalyst CuI (4 mg, 2 mol%) in water (2.5 mL) were treated as described for **3a** to obtain **3l** as a light brown oil (174 mg, 0.64 mmol, 64%). IR (Neat):  $\tilde{\nu}$  = 2835, 1715, 1511, 1246, 1032, 690  $\text{cm}^{-1}$ .  $^1\text{H}$  NMR (300 MHz,  $\text{CDCl}_3$ ):  $\delta$  = 2.95 (dd,  $J$  = 6.6 Hz, 14.4 Hz, 1 H, H-3), 3.15 (dd,  $J$  = 8.4 Hz, 14.7 Hz, 1 H, H-3), 3.77–3.83 (m, 4 H, H-2 and H-OCH<sub>3</sub>), 6.87 (dd,  $J$  = 1.8 Hz, 6.6 Hz, 2 H, H-arom), 7.16 (dd,  $J$  = 1.8 Hz, 6.9 Hz, 2 H, H-arom), 7.28–7.32 (m, 3 H, H-arom), 7.38–7.41 (m, 2 H, H-arom), 9.48 (d,  $J$  = 3.9 Hz, 1 H, H-1) ppm.  $^{13}\text{C}$  NMR (75 MHz,  $\text{CDCl}_3$ ):  $\delta$  = 33.4, 55.2, 58.1, 114.0, 128.3, 129.0, 129.1, 130.1, 131.5, 133.1, 158.5, 194.3 ppm. HRMS: calcd. for  $\text{C}_{16}\text{H}_{16}\text{NaO}_2\text{S}$  295.0769; found 295.0770.

### 3-((4-Bromophenyl)thio)-4-phenylbutan-2-one (**3m**):<sup>2</sup>

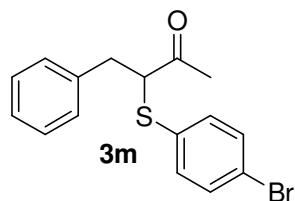

Alcohol **1a** (145  $\mu\text{L}$ , 1 mmol), 4-bromobenzenethiol **2b** (284 mg, 1.5 mmol) and the catalyst CuI (4 mg, 2 mol%) in water (2.5 mL) were treated as described for **3a** to obtain **3m** as a yellowish oil (248 mg, 0.74 mmol, 74%). IR (Neat):  $\tilde{\nu}$  = 3027, 2912, 1705, 1472, 813, 697  $\text{cm}^{-1}$ .  $^1\text{H}$  NMR (300 MHz,  $\text{CDCl}_3$ ): 2.23 (s, 3 H, H-1),  $\delta$  = 3.00 (dd,  $J$  = 6.8 Hz, 14.4 Hz, 1 H, H-4), 3.19 (dd,  $J$  = 8.0 Hz, 14 Hz, 1 H, H-4), 3.90 (t,  $J$  = 6.8, 1 H, H-3), 7.19–7.33 (m, 7 H, H-arom), 7.42–7.44 (m, 2 H, H-arom) ppm.  $^{13}\text{C}$  NMR (100 MHz,  $\text{CDCl}_3$ ):  $\delta$  = 27.6, 36.5, 58.5, 122.6, 126.9, 128.5, 129.0, 131.6, 132.2, 134.5, 137.7, 203.8 ppm.

**3-((4-Chlorophenyl)thio)-4-phenylbutan-2-one (3n):**

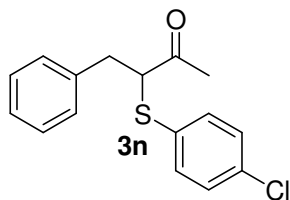

Alcohol **1a** (145  $\mu$ L, 1 mmol), 4-chlorobenzenethiol **2c** (217 mg, 1.5 mmol) and the catalyst CuI (4 mg, 2 mol%) in water (2.5 mL) were treated as described for **3a** to obtain **3n** as a yellowish oil (223 mg, 0.77 mmol, 77%). IR (Neat):  $\tilde{\nu}$  = 3415, 3028, 1706, 1475, 1093, 716  $\text{cm}^{-1}$ .  $^1\text{H}$  NMR (500 MHz,  $\text{CDCl}_3$ ):  $\delta$  = 2.26 (s, 3 H, H-1), 3.02 (dd,  $J$  = 7 Hz, 14 Hz, 1 H, H-4), 3.20 (dd,  $J$  = 9.0 Hz, 14.5 Hz, 1 H, H-4), 3.92 (t,  $J$  = 6.5, 1 H, H-3), 7.23–7.36 (m, 9 H, H-arom) ppm.  $^{13}\text{C}$  NMR (125 MHz,  $\text{CDCl}_3$ ):  $\delta$  = 27.7, 36.4, 58.6, 126.8, 128.6, 129.0, 129.3, 130.9, 134.4, 134.6, 137.7, 203.8 ppm. HRMS: calcd. for  $\text{C}_{16}\text{H}_{15}\text{ClNaOS}$  313.0430; found 313.0424.

**3-((4-Fluorophenyl)thio)-4-phenylbutan-2-one (3o):**

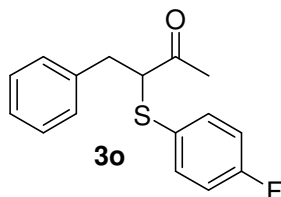

Alcohol **1a** (145  $\mu$ L, 1 mmol), 4-fluorobenzenethiol **2d** (160  $\mu$ L, 1.5 mmol) and the catalyst CuI (4 mg, 2 mol%) in water (2.5 mL) were treated as described for **3a** to obtain **3o** as a yellowish oil (248 mg, 0.90 mmol, 90%). IR (Neat):  $\tilde{\nu}$  = 3030, 1706, 1488, 1222, 829  $\text{cm}^{-1}$ .  $^1\text{H}$  NMR (400 MHz,  $\text{CDCl}_3$ ):  $\delta$  = 2.24 (s, 3 H, H-1), 3.00 (dd,  $J$  = 6.4 Hz, 14 Hz, 1 H, H-4), 3.17 (dd,  $J$  = 8.4 Hz, 14 Hz, 1 H, H-4), 3.85 (t,  $J$  = 6.4, 1 H, H-3), 7.02 (m, 2 H, H-arom), 7.20–7.38 (m, 7 H, H-arom) ppm.  $^{13}\text{C}$  NMR (100 MHz,  $\text{CDCl}_3$ ):  $\delta$  = 27.8, 36.4, 58.09, 116.1, 116.4, 126.8, 127.2, 128.5, 129.0, 136.0, 136.1, 137.9, 161.8, 164.3, 203.7 ppm. HRMS: calcd. for  $\text{C}_{16}\text{H}_{15}\text{FNaOS}$  297.0725; found 297.0720.

**3-((4-Isopropylphenyl)thio)-4-phenylbutan-2-one (3p):**

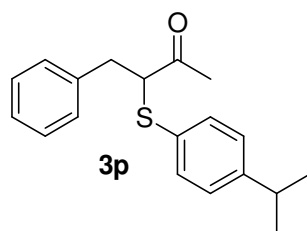

Alcohol **1a** (145  $\mu\text{L}$ , 1 mmol), 4-isopropylbenzenethiol **2e** (233  $\mu\text{L}$ , 1.5 mmol) and the catalyst CuI (4 mg, 2 mol%) in water (2.5 mL) were treated as described for **3a** to obtain **3p** as reddish yellow oil (217 mg, 0.73 mmol, 73%). IR (Neat):  $\tilde{\nu}$  = 2961, 2924, 1705, 1350, 833, 709  $\text{cm}^{-1}$ .  $^1\text{H}$  NMR (400 MHz,  $\text{CDCl}_3$ ):  $\delta$  = 1.22–1.30 (m, 6 H, H-methyl), 2.25 (s, 3 H, H-1), 2.89–3.00 (m, 1 H,  $\text{CH}(\text{CH}_3)_2$ ), 3.04 (dd,  $J$  = 8.4 Hz, 14.4 Hz, 1 H, H-4), 3.21 (dd,  $J$  = 8.4 Hz, 14.4 Hz, 1 H, H-4), 3.90 (t,  $J$  = 7.2, 1 H, H-3), 7.09–7.34 (m, 9 H, H-arom) ppm.  $^{13}\text{C}$  NMR (100 MHz,  $\text{CDCl}_3$ ):  $\delta$  = 24.1, 24.2, 28.1, 34.1, 36.9, 59.2, 127, 127.5, 127.6, 128.8, 129.4, 129.5, 133.9, 138.5, 149.7, 204.5 ppm. HRMS: calcd. for  $\text{C}_{19}\text{H}_{22}\text{NaOS}$  321.1289; found 321.1284.

### 3-((4-Methoxyphenyl)thio)-4-phenylbutan-2-one (**3q**):<sup>2</sup>

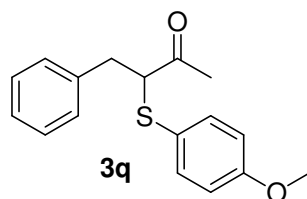

Alcohol **1a** (145  $\mu\text{L}$ , 1 mmol), 4-methoxybenzenethiol **2f** (184  $\mu\text{L}$ , 1.5 mmol) and the catalyst CuI (4 mg, 2 mol%) in water (2.5 mL) were treated as described for **3a** to obtain **3q** as a reddish yellow oil (182 mg, 0.64 mmol, 64%). IR (Neat):  $\tilde{\nu}$  = 2988, 2901, 1705, 1492, 1245, 827, 698  $\text{cm}^{-1}$ .  $^1\text{H}$  NMR (400 MHz,  $\text{CDCl}_3$ ):  $\delta$  = 2.23 (d,  $J$  = 2 Hz, 3 H, H-1), 2.97 (dd,  $J$  = 6.8, 16 Hz, 1 H, H-4), 3.13 (dd,  $J$  = 8.8 Hz, 14.4 Hz, 1 H, H-4), 3.78–3.80 (m, 1 H, H-3), 3.81 (s, 3 H, H-methoxy), 6.84–6.88 (m, 2 H, H-arom), 7.20–7.34 (m, 7 H, H-arom) ppm.  $^{13}\text{C}$  NMR (100 MHz,  $\text{CDCl}_3$ ):  $\delta$  = 28.1, 36.2, 55.2, 59, 114.6, 122.1, 126.6, 128.4, 129.0, 136.3, 138.2, 160.3, 203.8 ppm.

### 3-(Phenylthio)hexan-2-one (**3r**):<sup>1</sup>

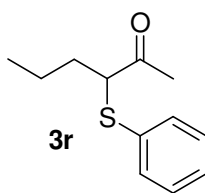

Alcohol **1m** (324  $\mu$ L, 3 mmol), benzenethiol **2a** (103  $\mu$ L, 1 mmol) and the catalyst CuI (4 mg, 2 mol%) in water (2.5 mL) were treated as described for **3a** to obtain **3r** as a yellowish oil (139 mg, 0.67 mmol, 67%).  $^1\text{H}$  NMR (300 MHz,  $\text{CDCl}_3$ ):  $\delta$  = 0.96 (t,  $J$  = 7.2 Hz, 3 H, H-6), 1.38–1.60 (m, 2 H, H-5), 1.64–1.86 (m, 2 H, H-4), 2.26 (s, 3 H, H-1), 3.65 (t,  $J$  = 7.5 Hz, 1 H, H-3), 7.24–7.44 (m, 5 H, H-arom) ppm.  $^{13}\text{C}$  NMR (75 MHz,  $\text{CDCl}_3$ ):  $\delta$  = 14.0, 20.8, 26.6, 32.7, 57.8, 128.1, 129.3, 132.4, 133.4, 205.8 ppm.

**4-Cyclopentyl-3-(phenylthio)butan-2-one (3s):<sup>1</sup>**

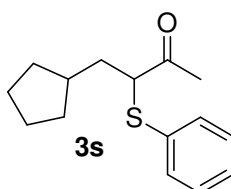

Alcohol **1n** (138 mg, 1 mmol), benzenethiol **2a** (308  $\mu$ L, 3 mmol) and the catalyst CuI (4 mg, 2 mol%) in water (2.5 mL) were treated as described for **3a** to obtain **3s** as a yellowish oil (178 mg, 0.73 mmol, 73%). IR (Neat):  $\tilde{\nu}$  = 2947, 1705, 1353, 1209, 1025, 739, 690  $\text{cm}^{-1}$ .  $^1\text{H}$  NMR (400 MHz,  $\text{CDCl}_3$ ):  $\delta$  = 1.08–1.18 (m, 2 H, H-aliphatic), 1.50–1.68 (m, 4 H, H-aliphatic), 1.71–1.90 (m, 4 H, H-aliphatic), 1.93–2.26 (m, 1 H, H-aliphatic), 2.26 (s, 3 H, H-1), 3.69 (t,  $J$  = 7.6 Hz, 1 H, H-3), 7.23–7.35 (m, 3 H, H-arom), 7.36–7.39 (m, 2 H, H-arom) ppm.  $^{13}\text{C}$  NMR (125 MHz,  $\text{CDCl}_3$ ):  $\delta$  = 24.9, 25.0, 26.2, 36.5, 37.7, 57.0, 127.7, 129.0, 132.1, 133.2, 205.6 ppm. HRMS: calcd. for  $\text{C}_{15}\text{H}_{20}\text{NaOS}$  271.1133; found 271.1131.

**4-Cyclohexyl-3-(phenylthio)butan-2-one (3t):**

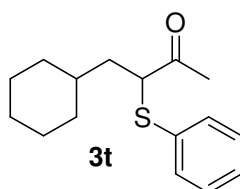

Alcohol **1o** (138 mg, 1 mmol), benzenethiol **2a** (308  $\mu$ L, 3 mmol) and the catalyst CuI (4 mg, 2 mol%) in water (2.5 mL) were treated as described for **3a** to obtain **3t** as a yellowish oil (196 mg, 0.75 mmol, 75%). IR (Neat):  $\tilde{\nu}$  = 2920, 1703, 1439, 1209, 1025, 739, 689  $\text{cm}^{-1}$ .  $^1\text{H}$

NMR (400 MHz,  $\text{CDCl}_3$ ):  $\delta$  = 0.90–0.96 (m, 2 H, H-aliphatic), 1.17–1.26 (m, 3 H), 1.40–1.70 (m, 8 H, H-aliphatic), 2.25 (s, 3 H, H-1), 3.76 (t,  $J$  = 7.6 Hz, 1 H, H-3), 7.25–7.36 (m, 5 H, H-arom) ppm.  $^{13}\text{C}$  NMR (100 MHz,  $\text{CDCl}_3$ ):  $\delta$  = 26.0, 26.1, 26.2, 26.4, 33.1, 35.3, 37.8, 55.3, 127.7, 129.0, 132.0, 133.0, 133.2, 205.5 ppm. HRMS: calcd. for  $\text{C}_{16}\text{H}_{22}\text{NaOS}$  285.1289; found 285.1284.

#### 6-Phenyl-3-(phenylthio)hexan-2-one (**3u**):

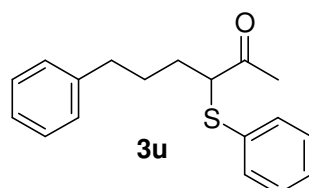

Alcohol **1p** (174 mg, 1 mmol), benzenethiol **2a** (308  $\mu\text{L}$ , 3 mmol) and the catalyst  $\text{CuI}$  (4 mg, 2 mol%) in water (2.5 mL) were treated as described for **3a** for 72 h to obtain **3u** as a yellowish oil (229 mg, 0.81 mmol, 81%). IR (Neat):  $\tilde{\nu}$  = 2988, 2937, 1703, 1354, 740, 690  $\text{cm}^{-1}$ .  $^1\text{H}$  NMR (400 MHz,  $\text{CDCl}_3$ ):  $\delta$  = 1.73–1.78 (m, 2 H, H-5), 1.85–1.90 (m, 2 H, H-4), 2.24 (s, 3 H, H-1), 2.67 (t,  $J$  = 6.8, 2 H, H-6), 3.63 (t,  $J$  = 6.4 Hz, 1 H, H-3), 7.18–7.38 (m, 10 H, H-arom) ppm.  $^{13}\text{C}$  NMR (100 MHz,  $\text{CDCl}_3$ ):  $\delta$  = 26.5, 28.9, 29.7, 35.4, 57.6, 125.9, 127.9, 128.3, 129, 132.4, 132.9, 141.5, 205 ppm. HRMS: calcd. for  $\text{C}_{18}\text{H}_{20}\text{NaOS}$  307.1133; found 307.1127.

#### E. Isolation and characterization of intermediate **4**.

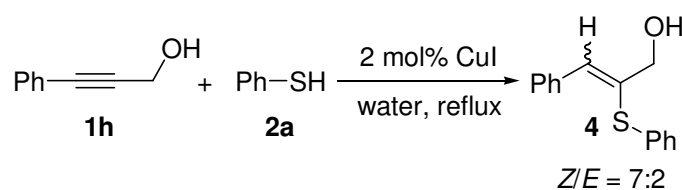

#### (*Z*)-3-Phenyl-2-(phenylthio)prop-2-en-1-ol (**4-Z**):<sup>1</sup>

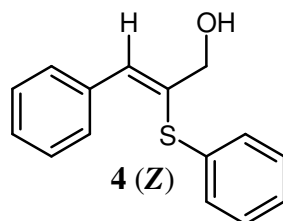

Alcohol **1h** (125  $\mu\text{L}$ , 1 mmol), benzenethiol **2a** (154  $\mu\text{L}$ , 1.5 mmol) and the catalyst  $\text{CuI}$  (4 mg, 2 mol%) were treated in water as described for **3f** for 18 h. Column chromatographic purification afforded the *E*- and *Z*- isomers of **4** (100 mg., 0.41 mmol, 41%) as a colorless oil ( $Z : E = 7 : 2$ ).  $^1\text{H}$  NMR (400 MHz,  $\text{CDCl}_3$ ):  $\delta$  = 2.33 (bs, 1 H, H-alcohol), 4.23 (s, 2 H, H-1),

7.20 (s, 1 H, H-3), 7.26–7.43 (m, 8 H, H-aromatic), 7.68–7.70 (m, 2 H, H-arom) ppm.  $^{13}\text{C}$  NMR (100 MHz,  $\text{CDCl}_3$ ):  $\delta$  = 66.3, 126.9, 127.8, 128.1, 129.1, 129.2, 129.3, 130.3, 133.2, 133.3, 133.4, ppm.

**(E)-3-Phenyl-2-(phenylthio)prop-2-en-1-ol (4-E):<sup>1</sup>**

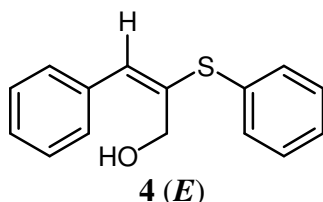

$^1\text{H}$  NMR (400 MHz,  $\text{CDCl}_3$ ):  $\delta$  = 2.09 (brs, 1 H, H-alcohol), 4.37 (s, 2 H, H-1), 6.96 (s, 1 H, H-3), 7.28–7.39 (m, 8 H, H-arom), 7.49–7.51 (m, 2 H, H-arom) ppm.  $^{13}\text{C}$  NMR (100 MHz,  $\text{CDCl}_3$ ):  $\delta$  = 60.3, 127.6, 127.7, 128.1, 128.5, 128.7, 128.8, 129.1, 129.3, 129.4, 131.5, 135.5, 135.9, 136.7 ppm.

**F. Cu-catalyzed conversion of intermediate 4 to product 3d in presence of 2a.<sup>a</sup>**

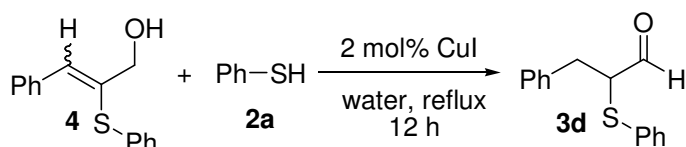

| Entry | Amount of <b>2a</b> | Yield <sup>b</sup> |
|-------|---------------------|--------------------|
| 1     | 0 mol%              | N.R.               |
| 2     | 10 mol%             | >95%               |

<sup>a</sup> Reaction conditions: **4** (0.5 mmol), **2a** (x mmol) and CuI (2 mol%), water (2.0 mL) for 12 h at reflux. <sup>b</sup> Conversion based on  $^1\text{H}$  NMR analysis of the crude reaction mixture.

**G. Large scale experiment.**

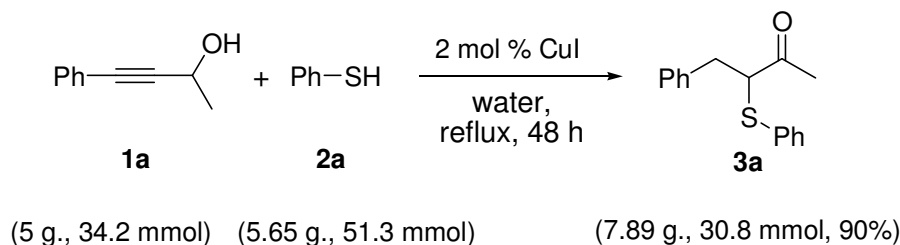

CuI (130 mg, 0.68 mmol, 2 mol%) was weighed and transferred to a 25 mL vial containing a magnet under nitrogen atmosphere. The cap of the vial was closed tightly. 10 mL of degassed water followed by alcohol **1a** (5 g, 4.98 mL, 34.2 mmol) and benzenethiol **2a** (5.65 g, 5.27 mL, 51.3 mmol) were added to the vial by syringe and was stirred using a magnetic stirrer at

reflux for 24 h. After allowing the mixture to cool to room temperature, the reaction mixture was extracted with ethyl acetate (3 × 60 mL). The combined organic phase was washed with water and brine, dried with anhydrous Na<sub>2</sub>SO<sub>4</sub> and concentrated under reduced pressure. The residue was purified by silica-gel (100–200 mesh) column chromatography using 3% (v/v) ethyl acetate / pentane solution to afford the desired product **3a** (7.89 g, 30.8 mmol, 90%).



## H. Copies of $^1\text{H}$ and $^{13}\text{C}$ NMR Spectra of all products.

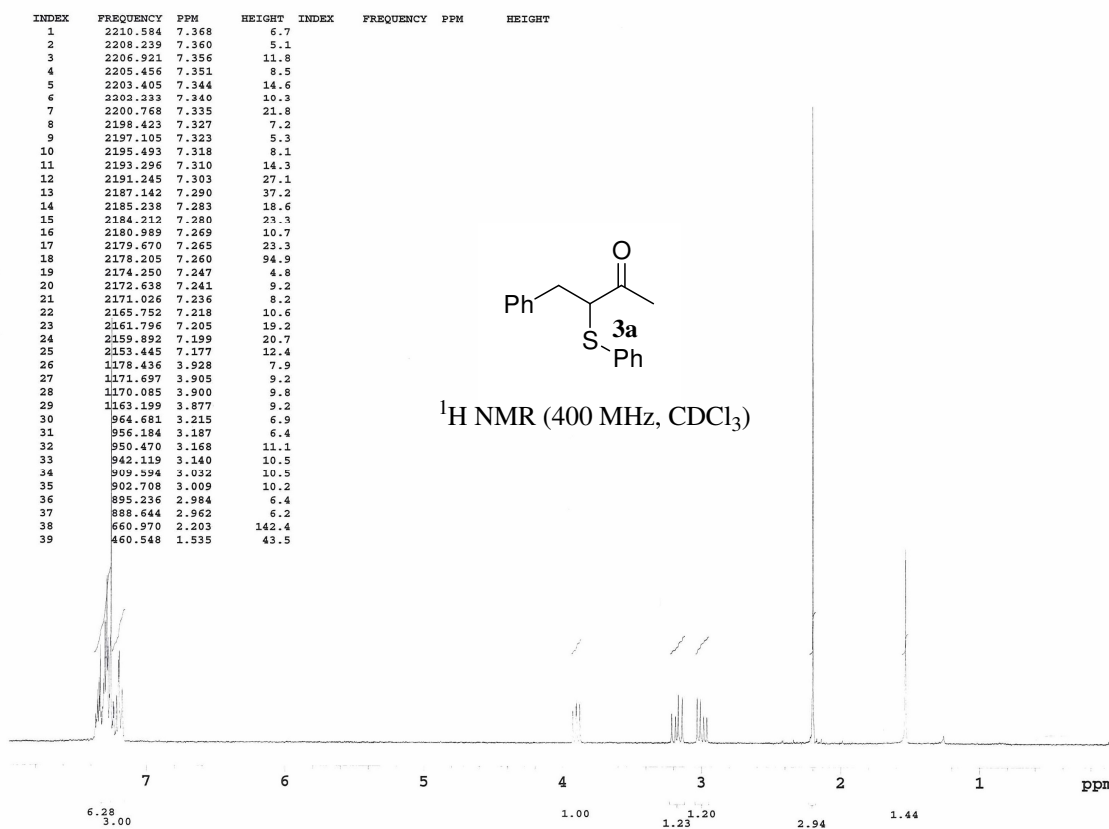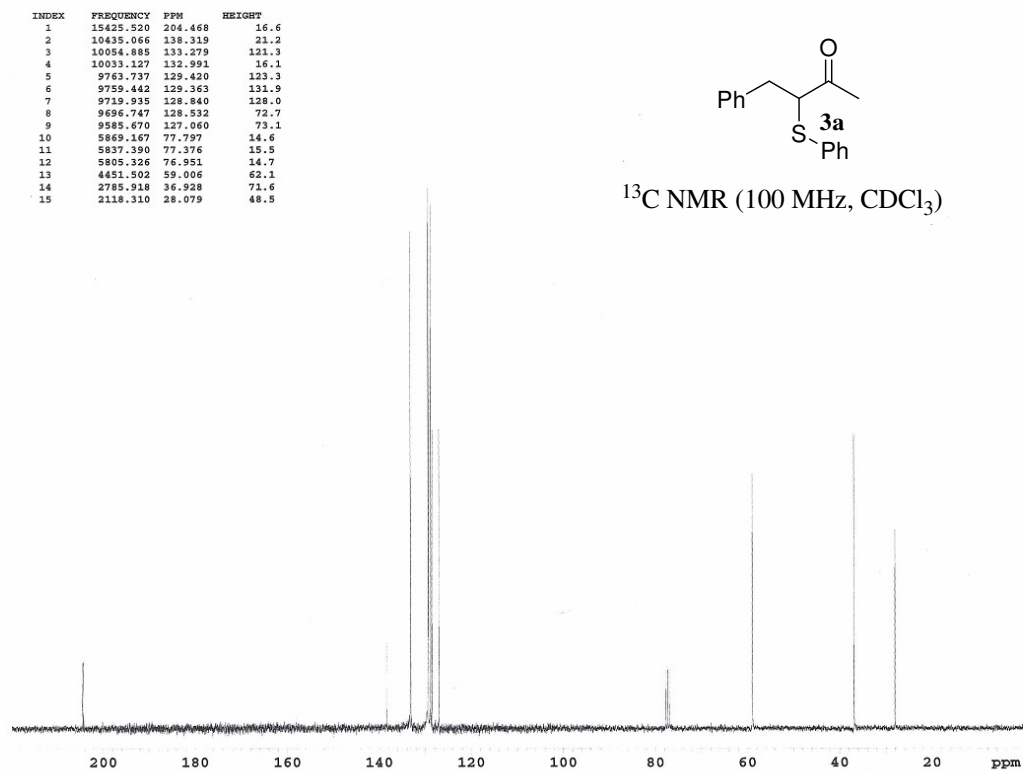

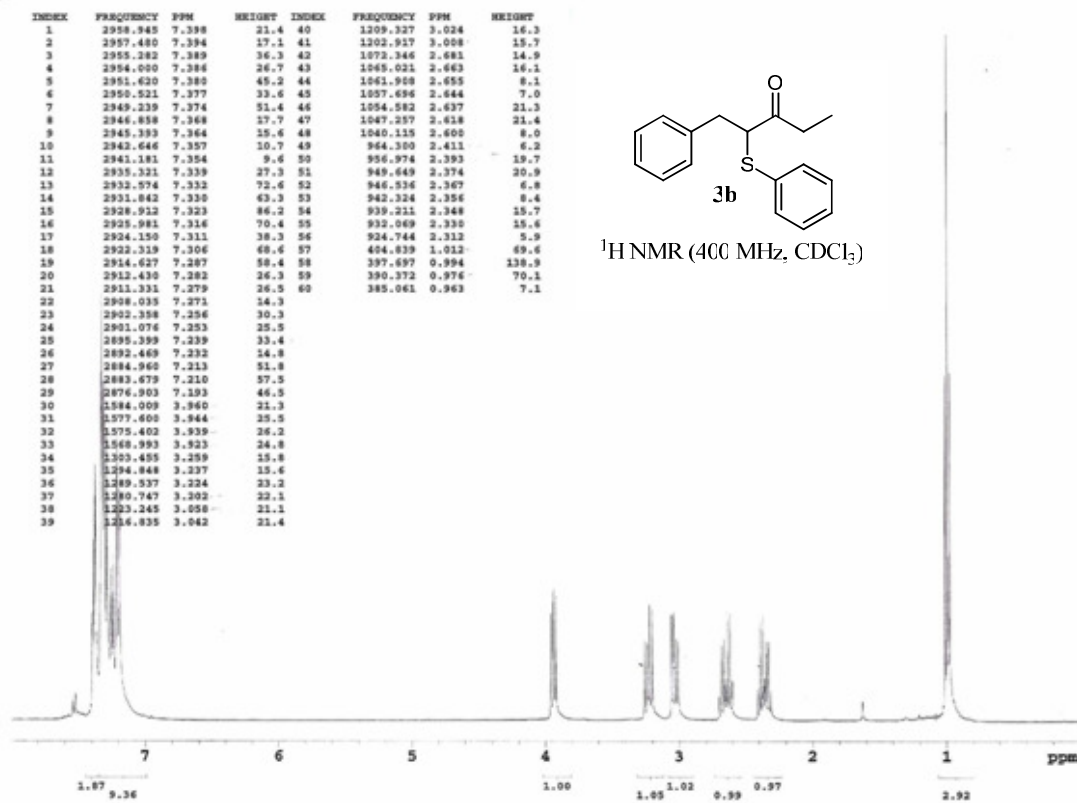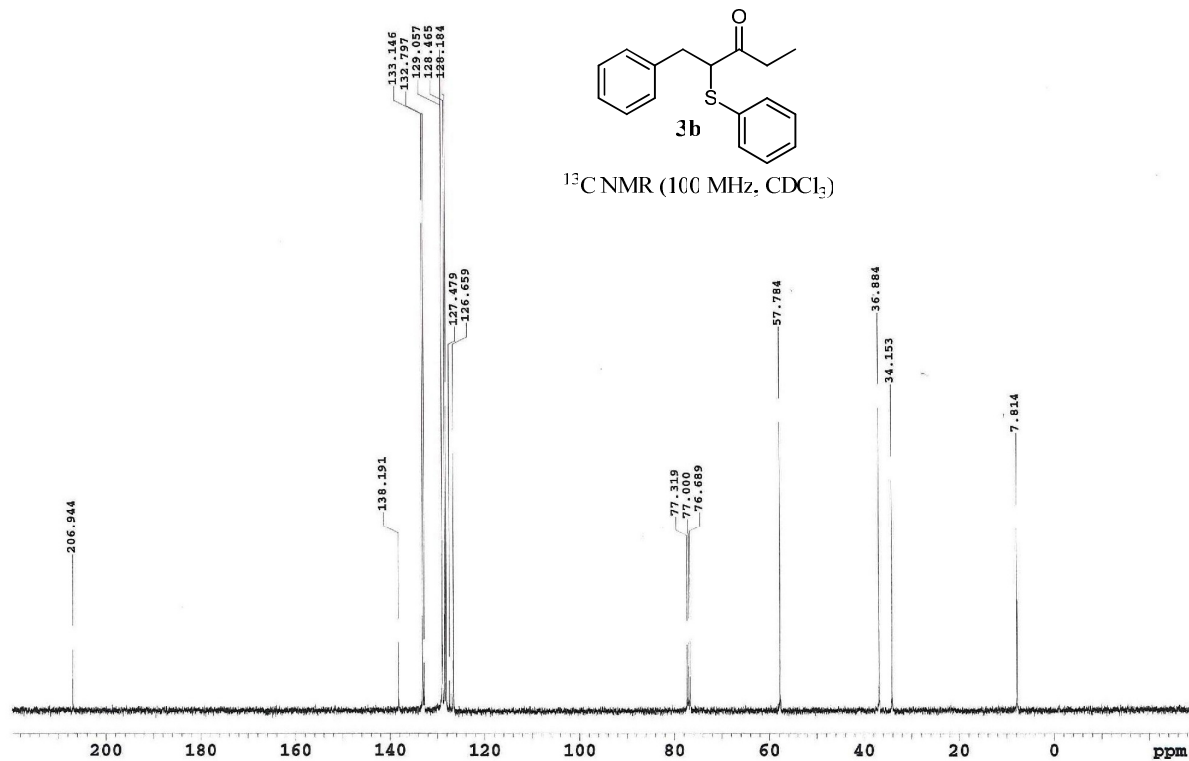

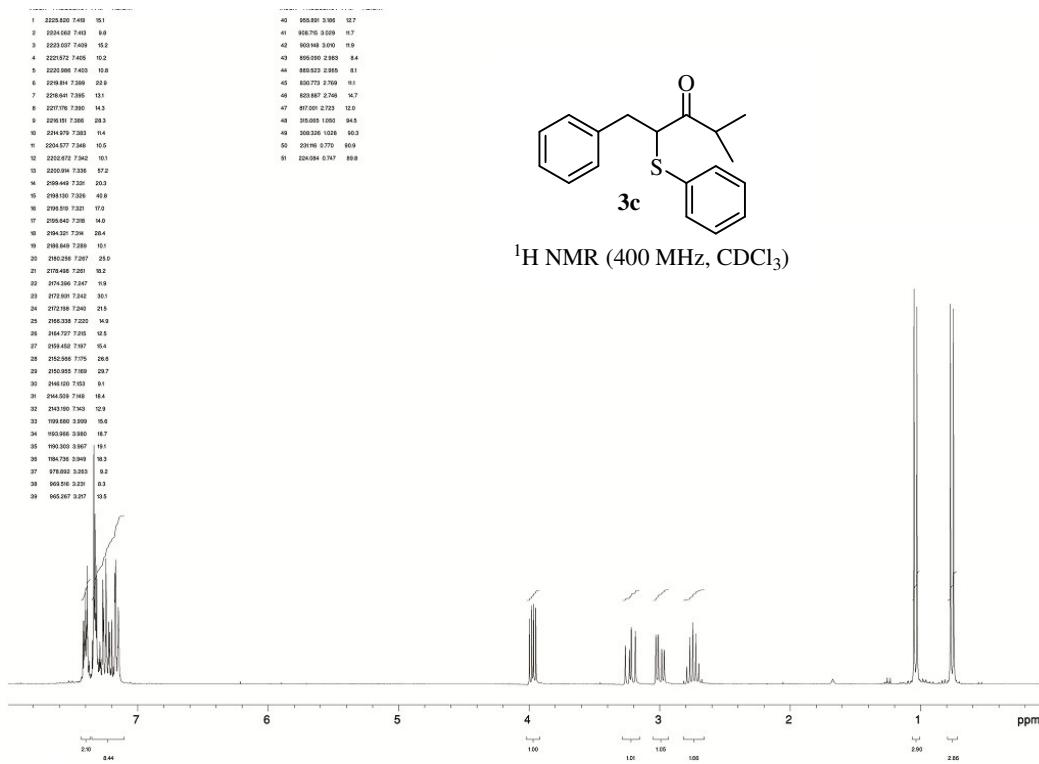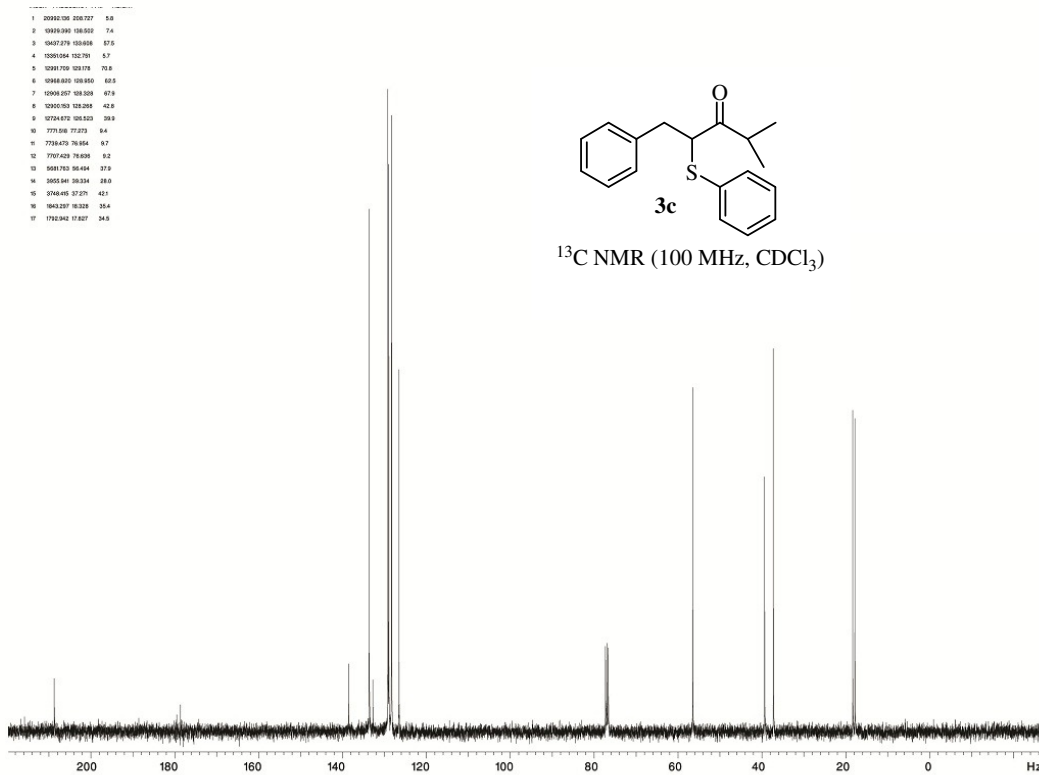

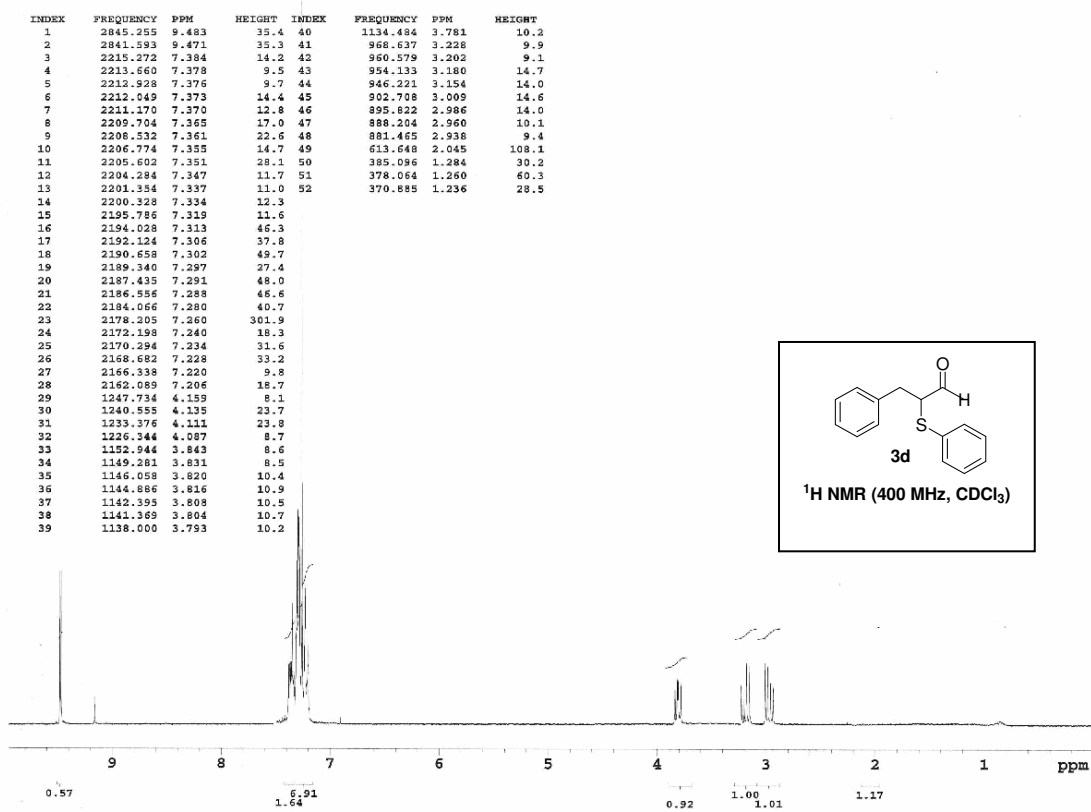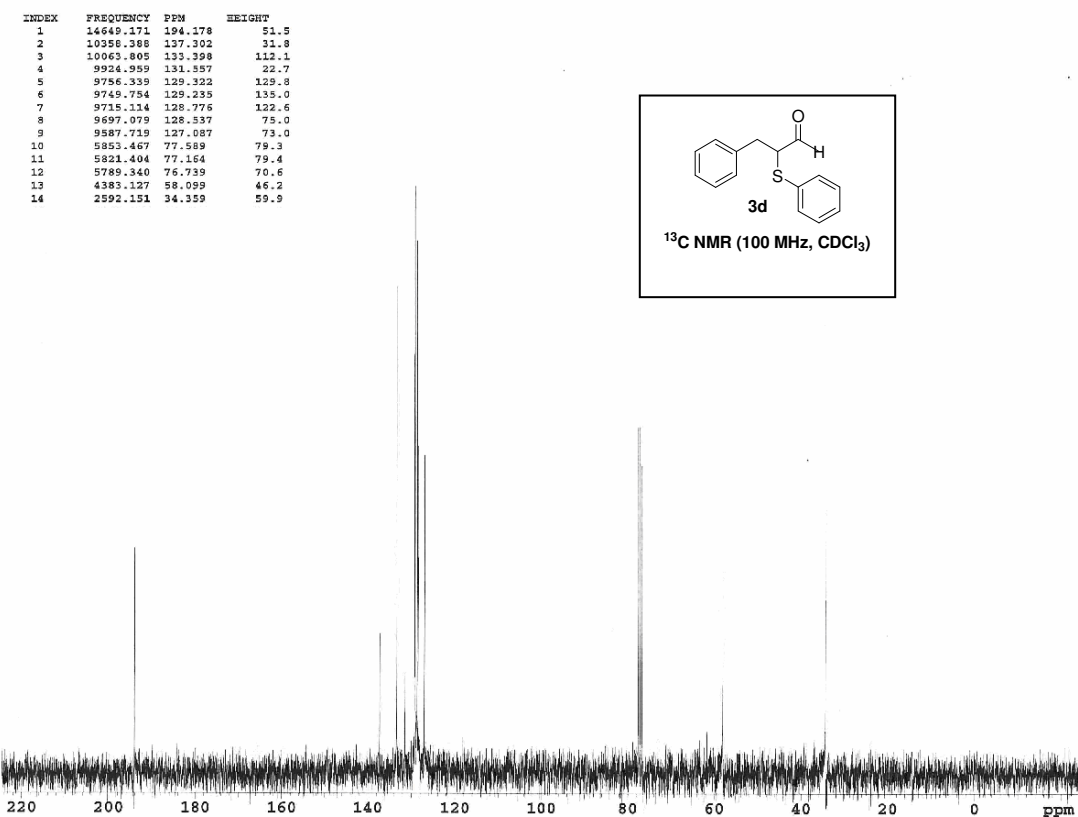

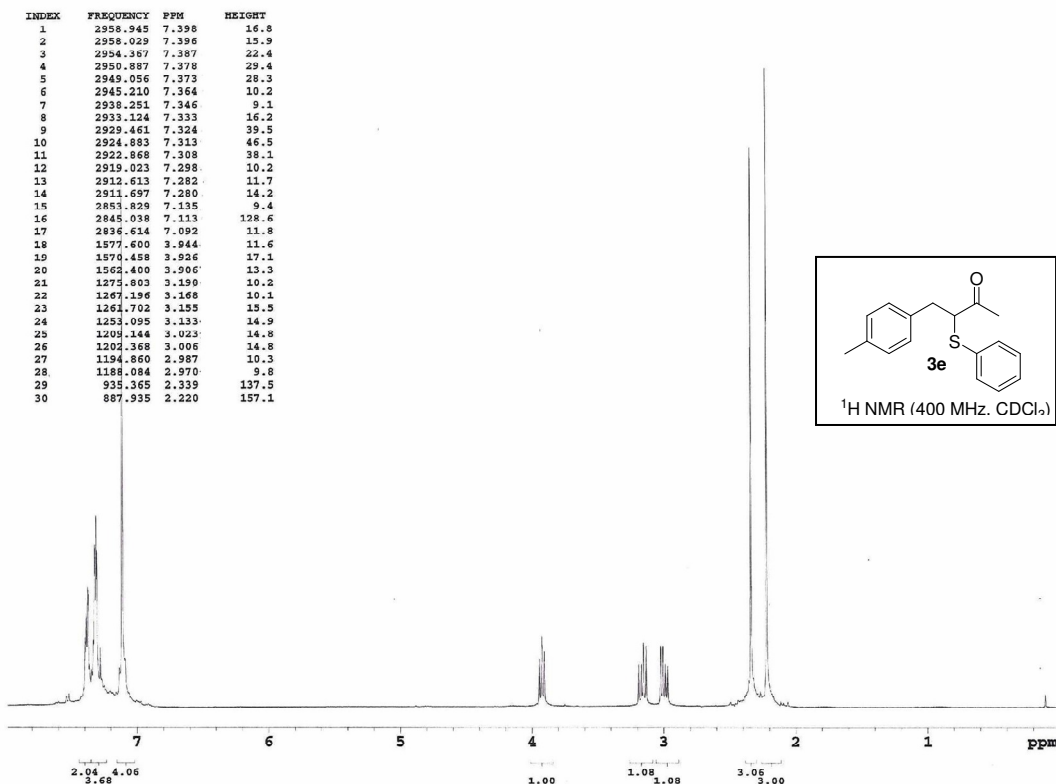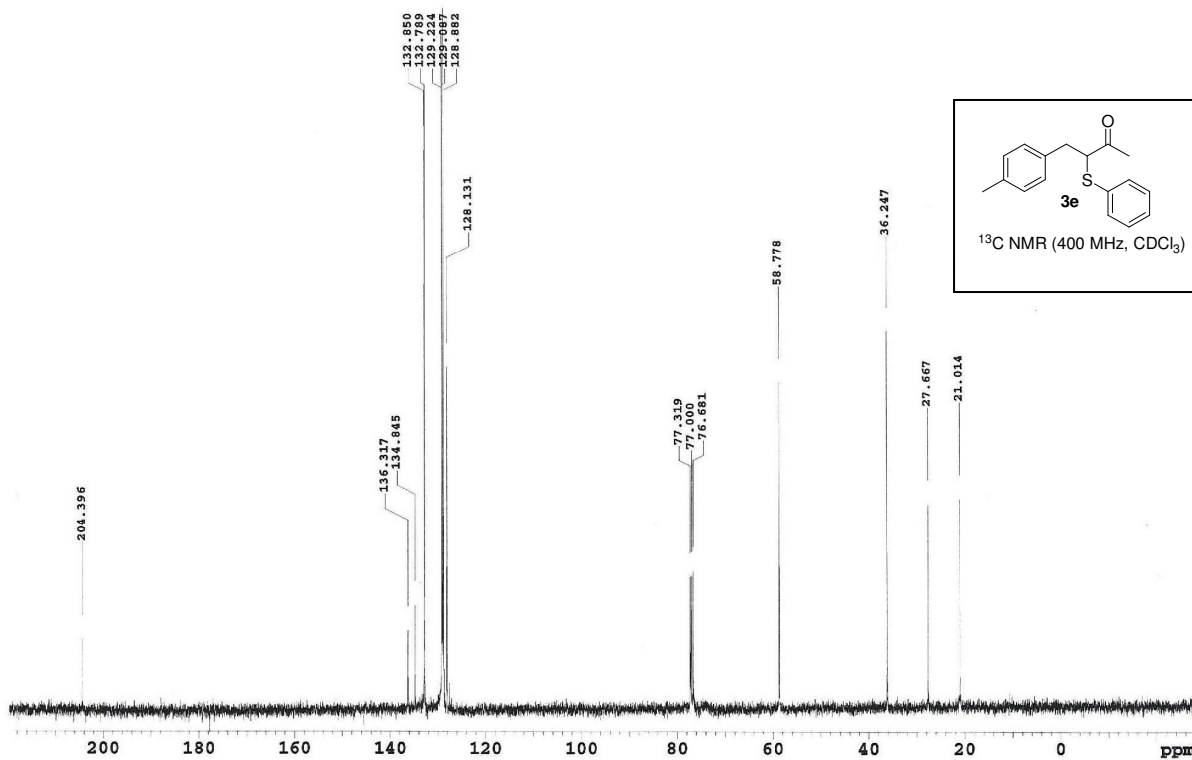

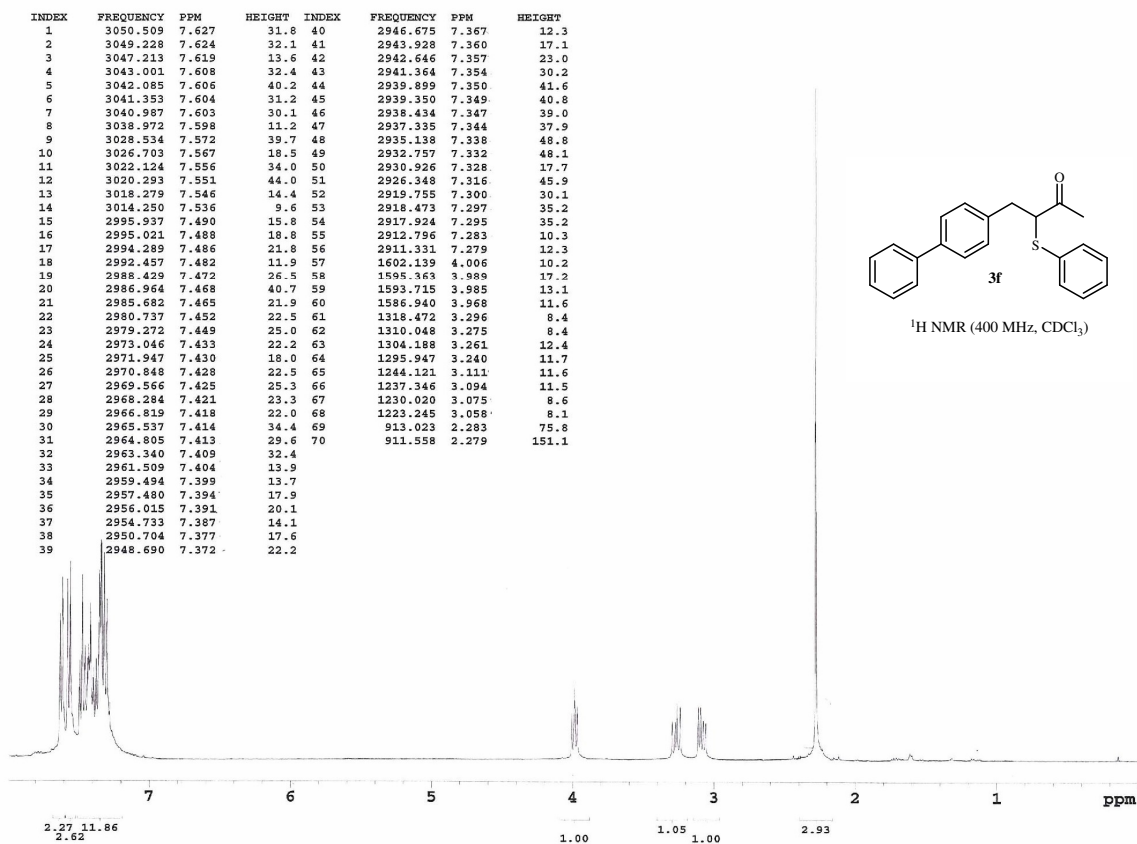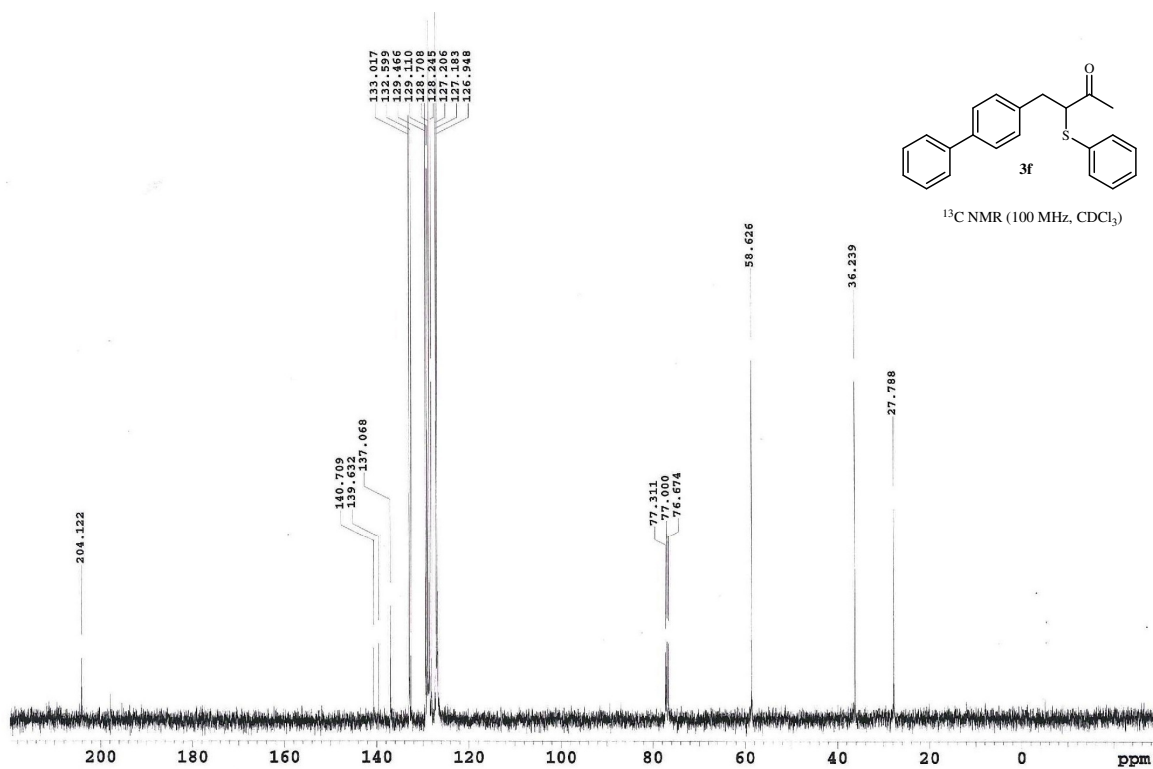

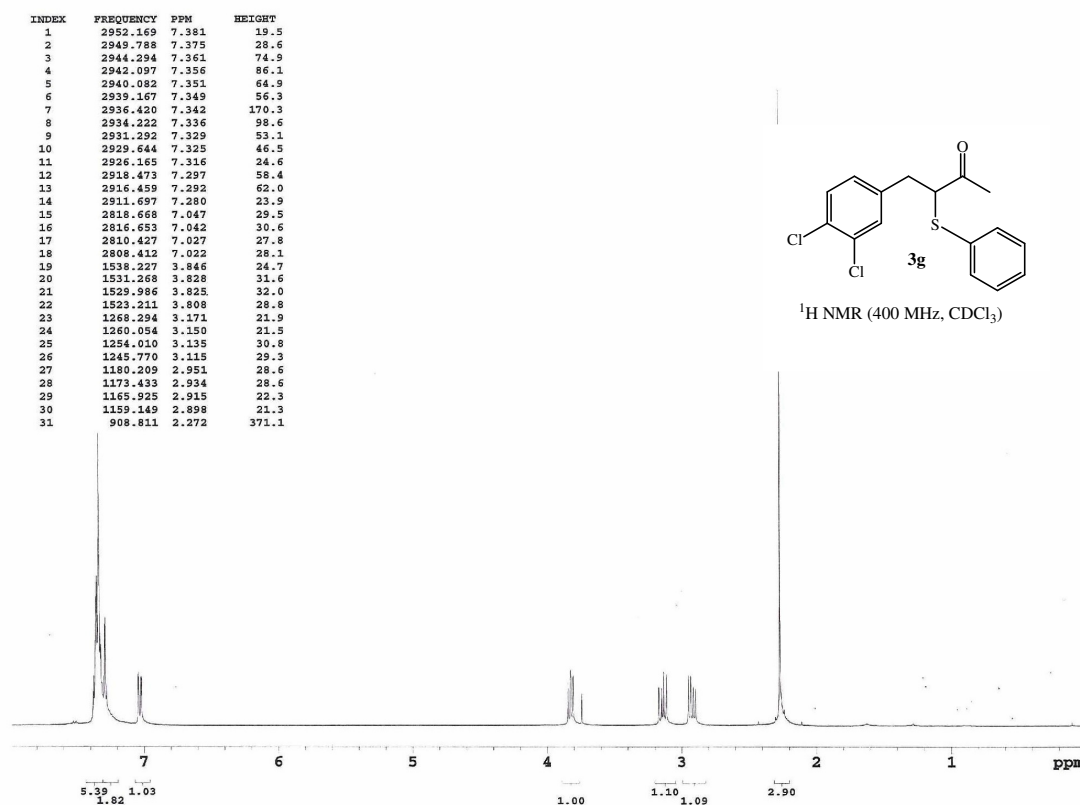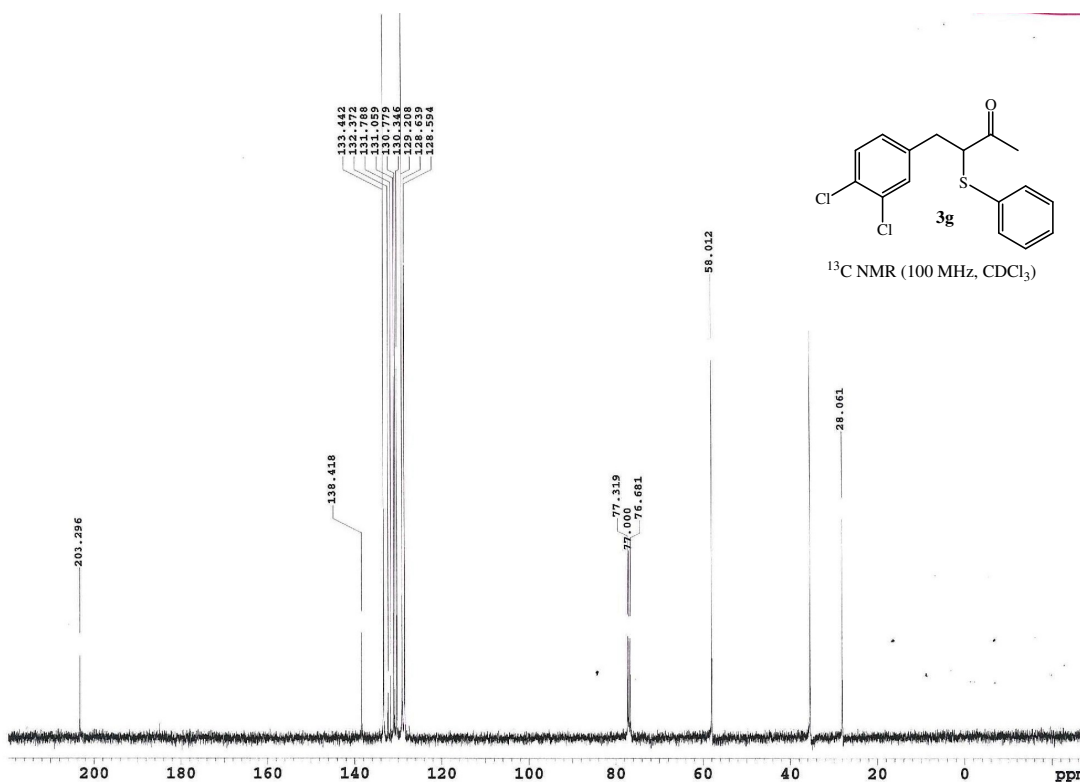

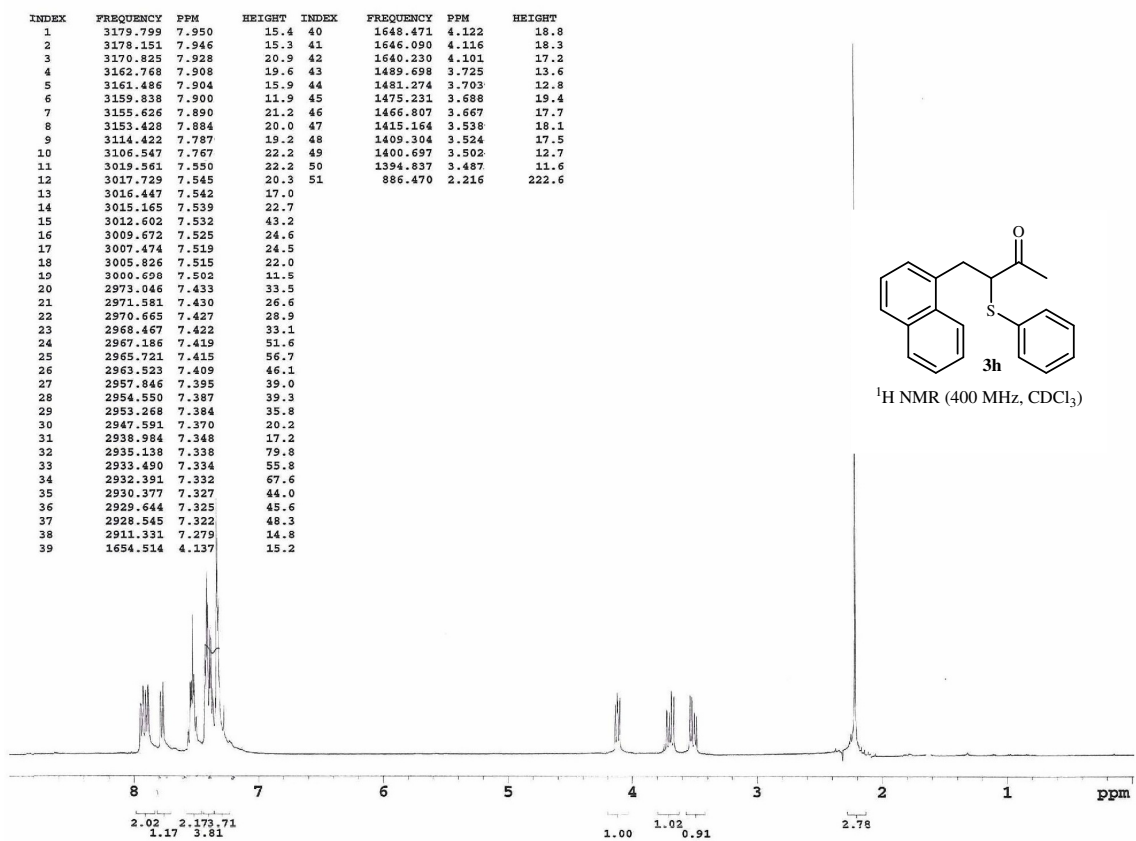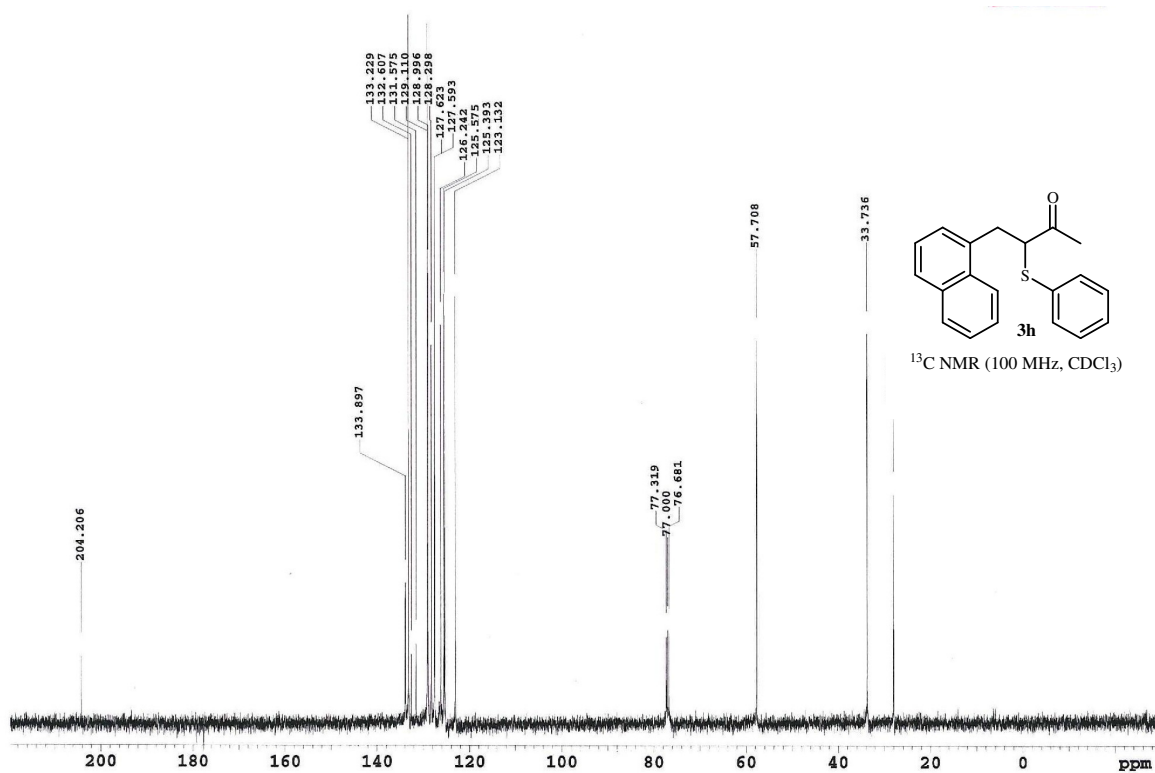



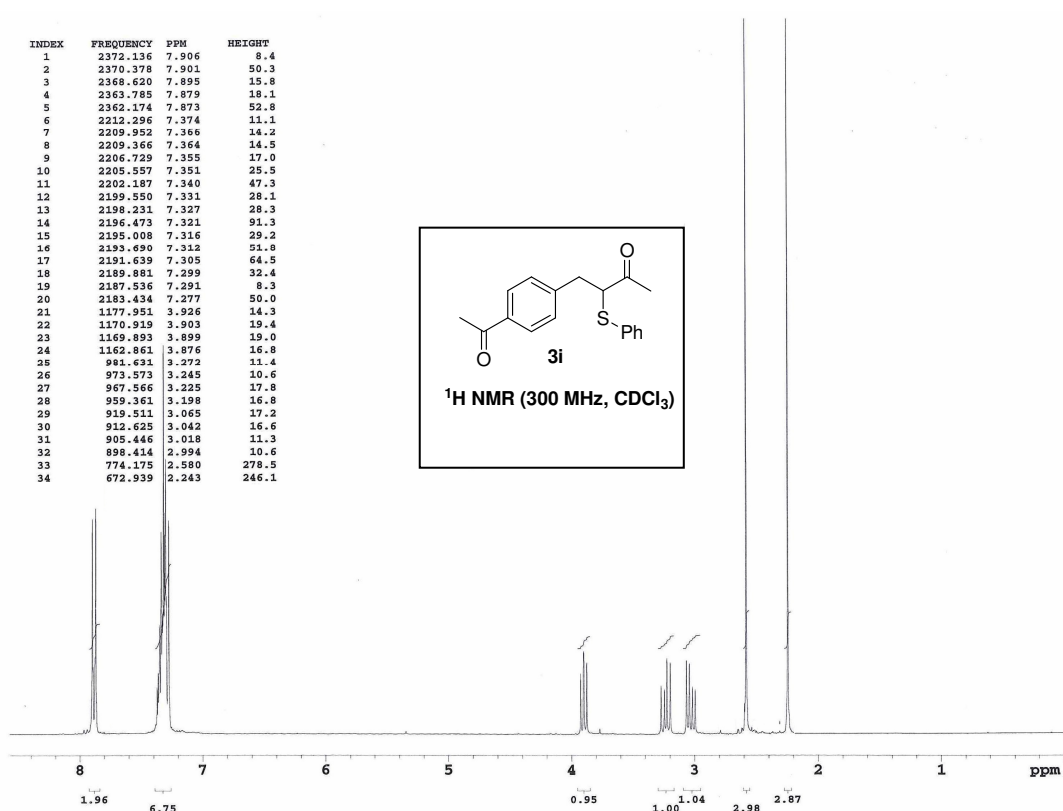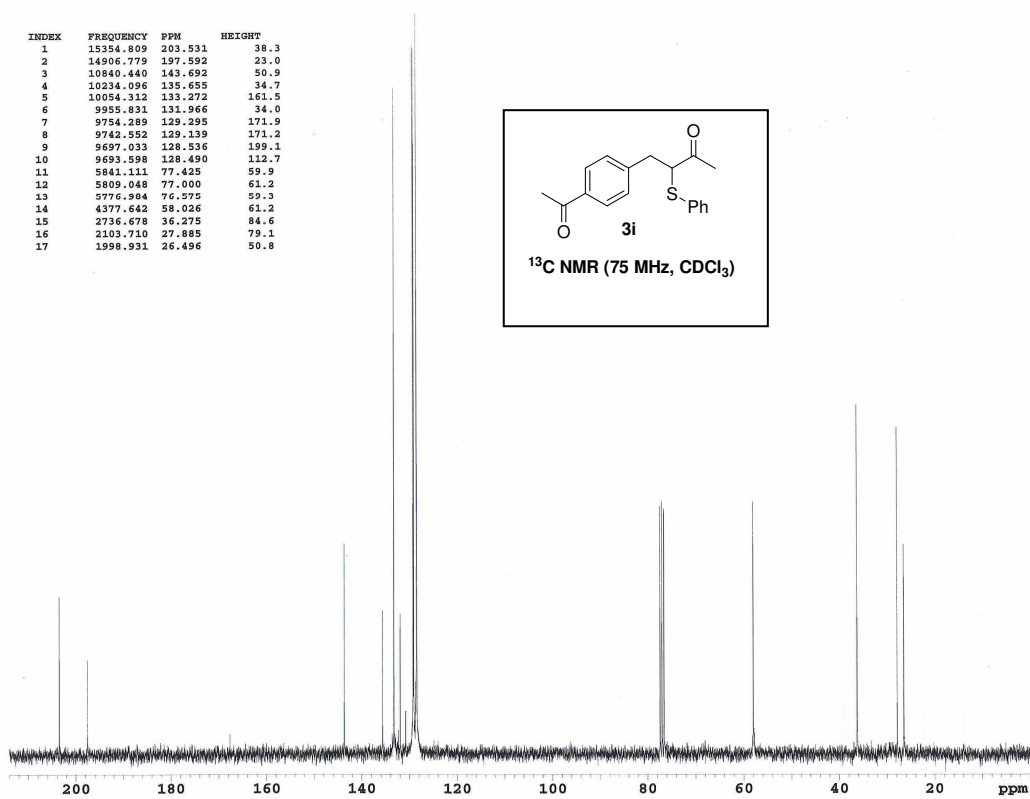

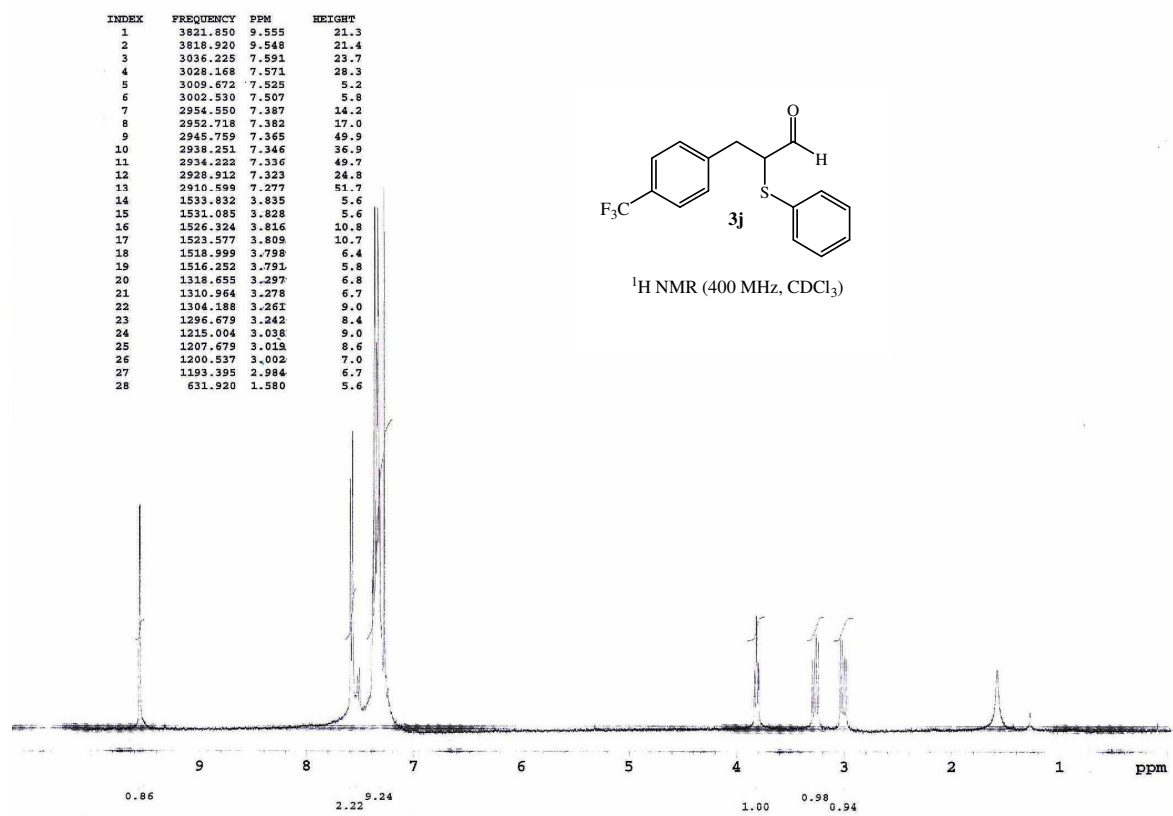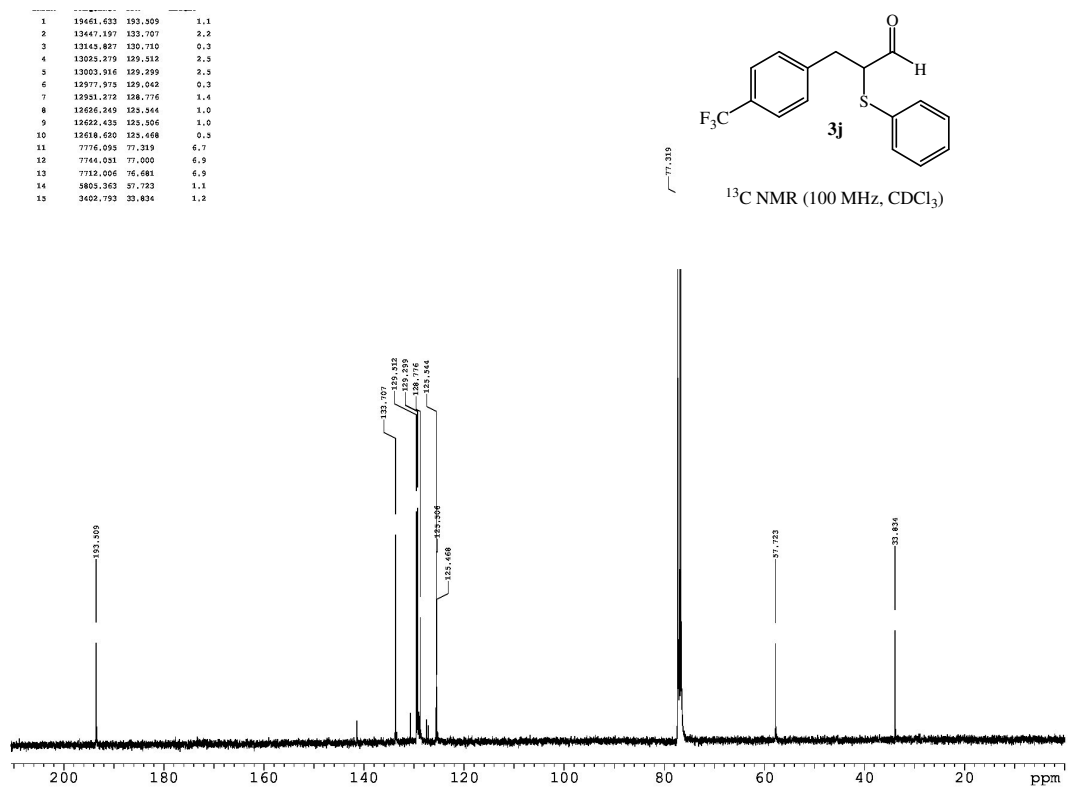

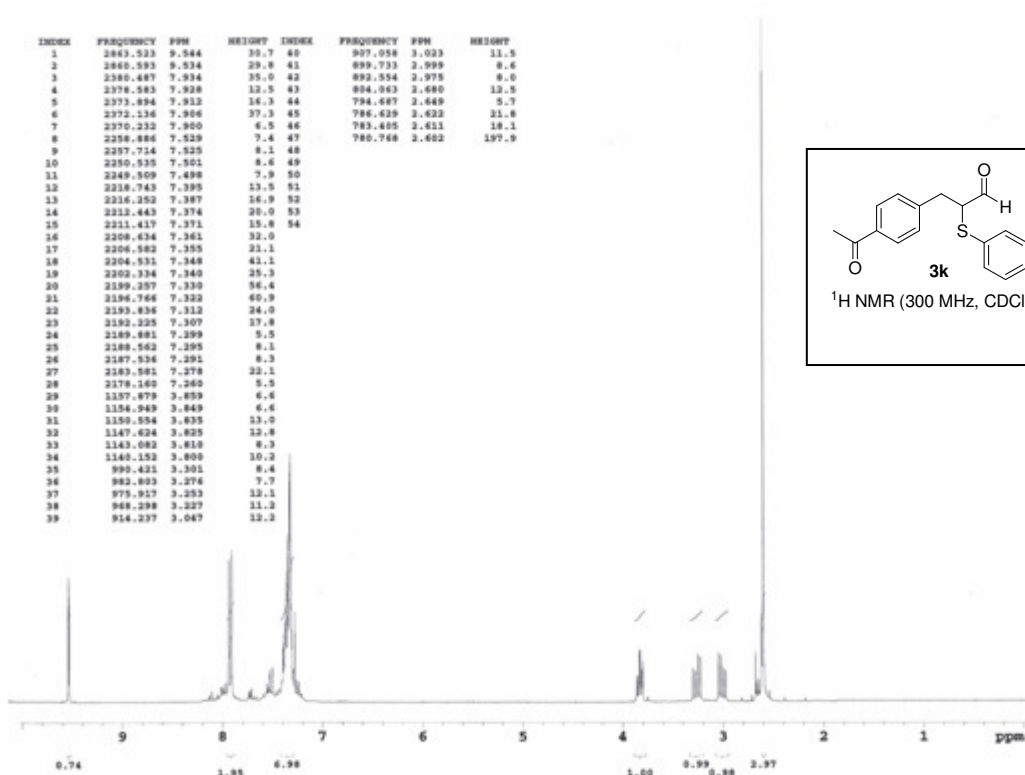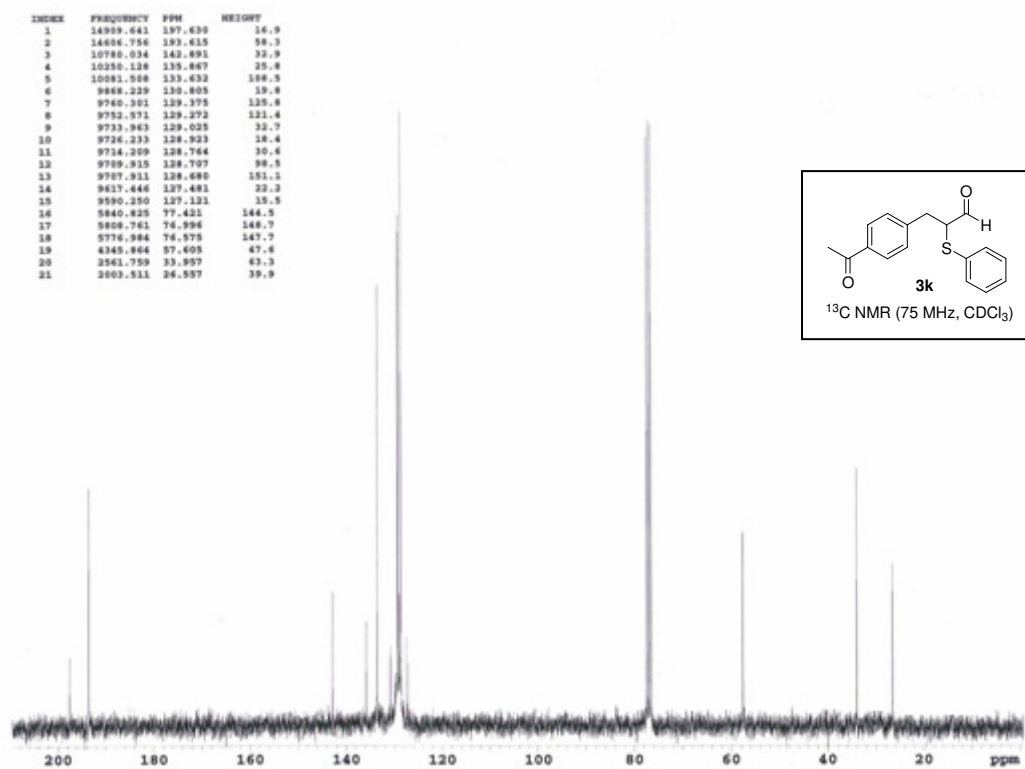

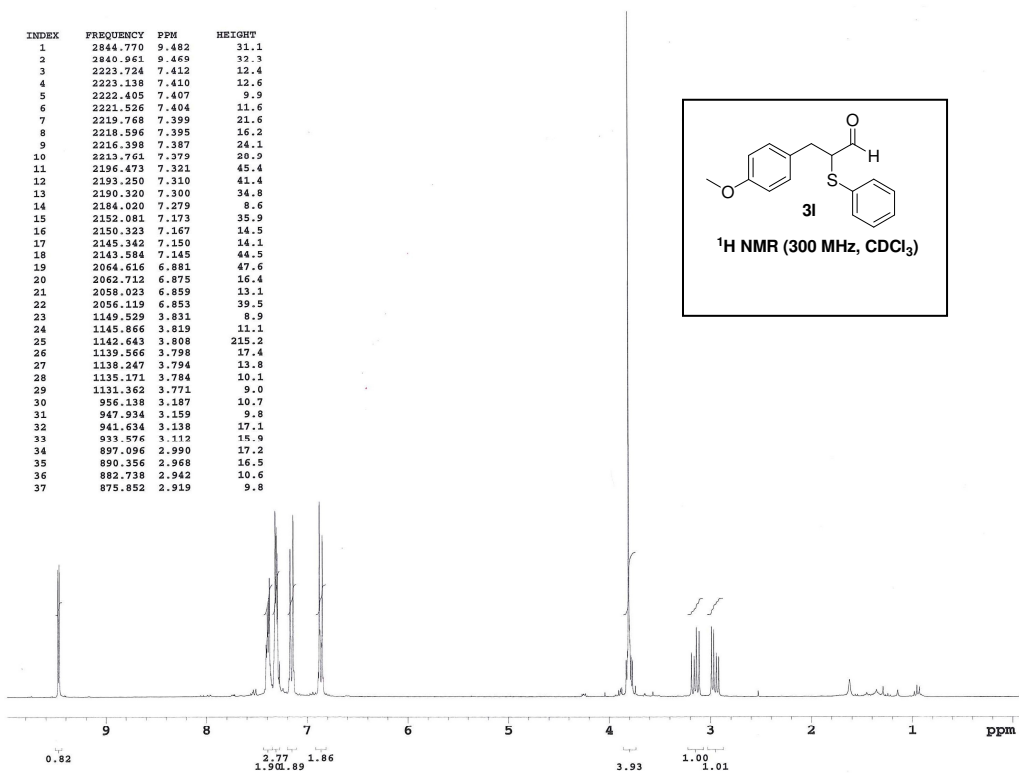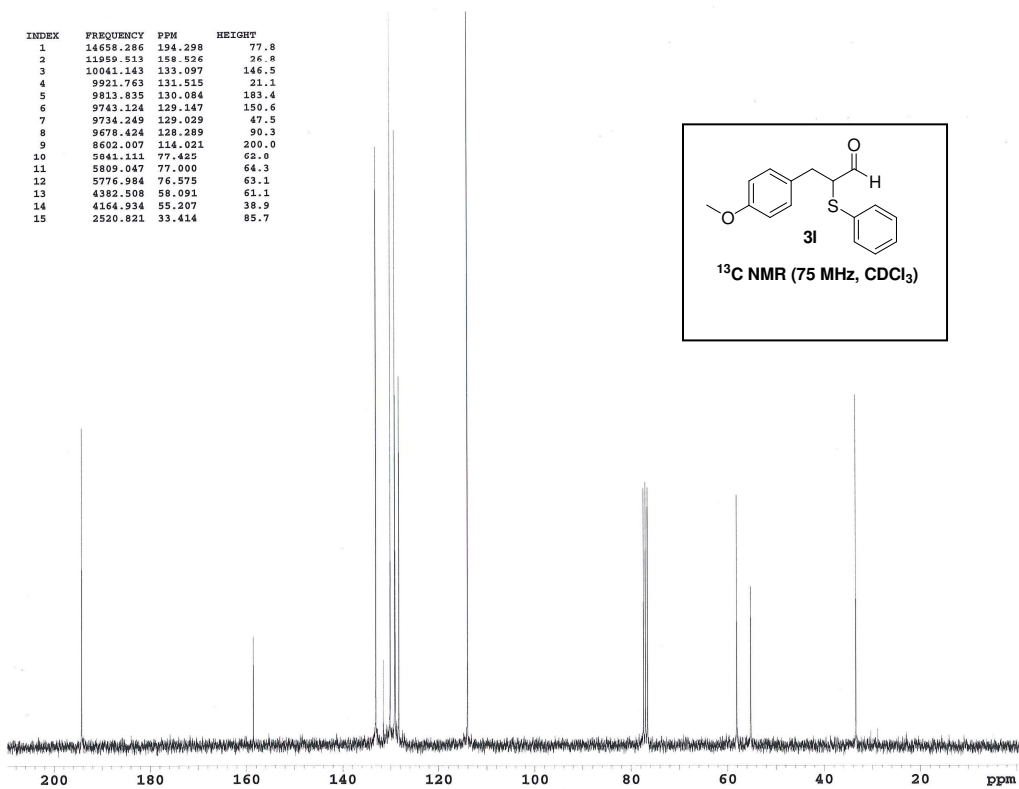

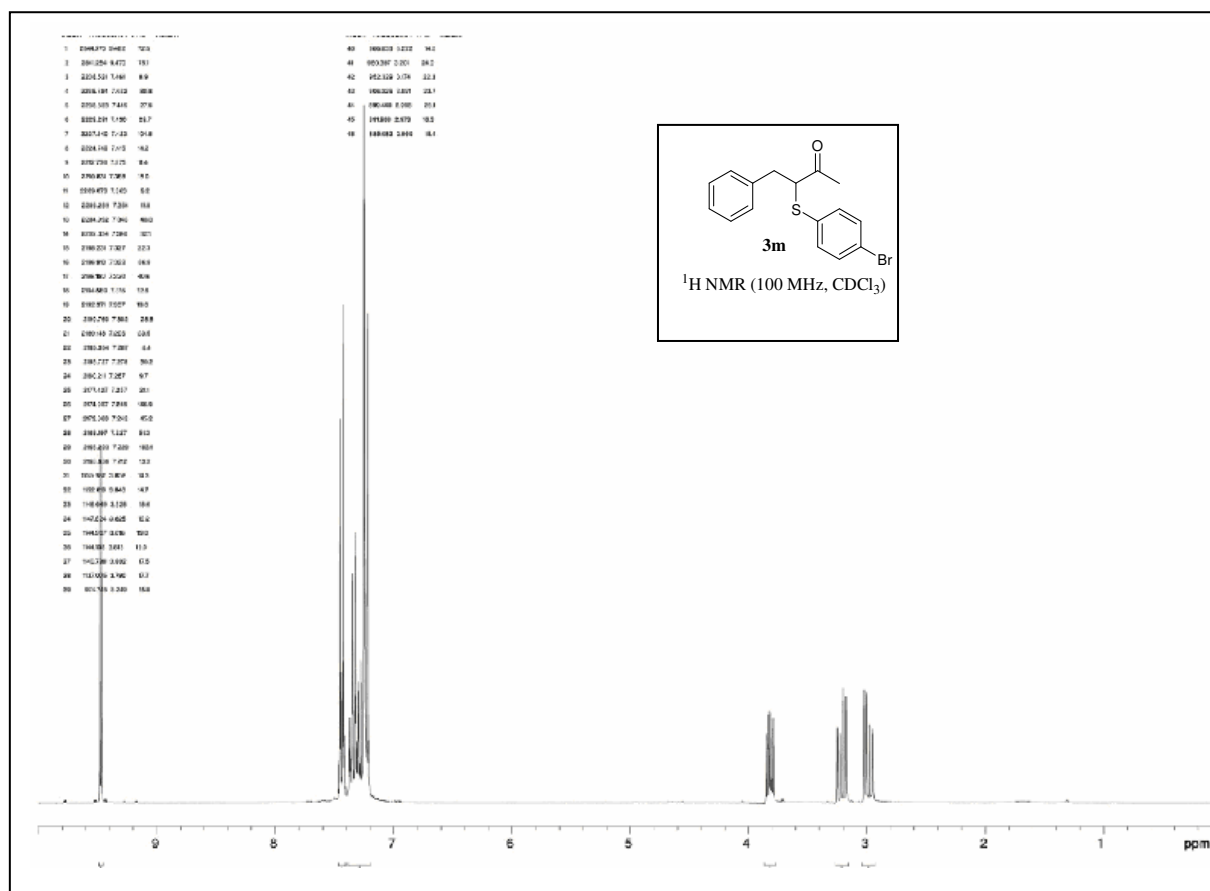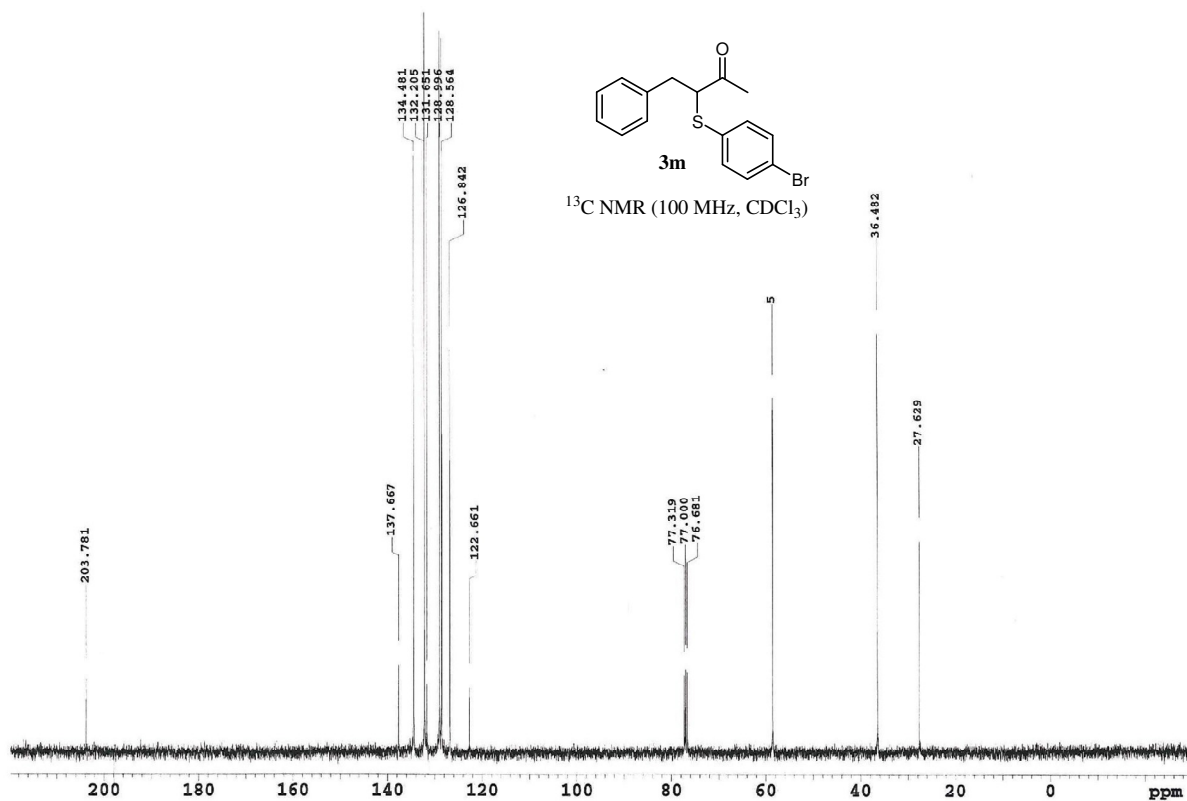

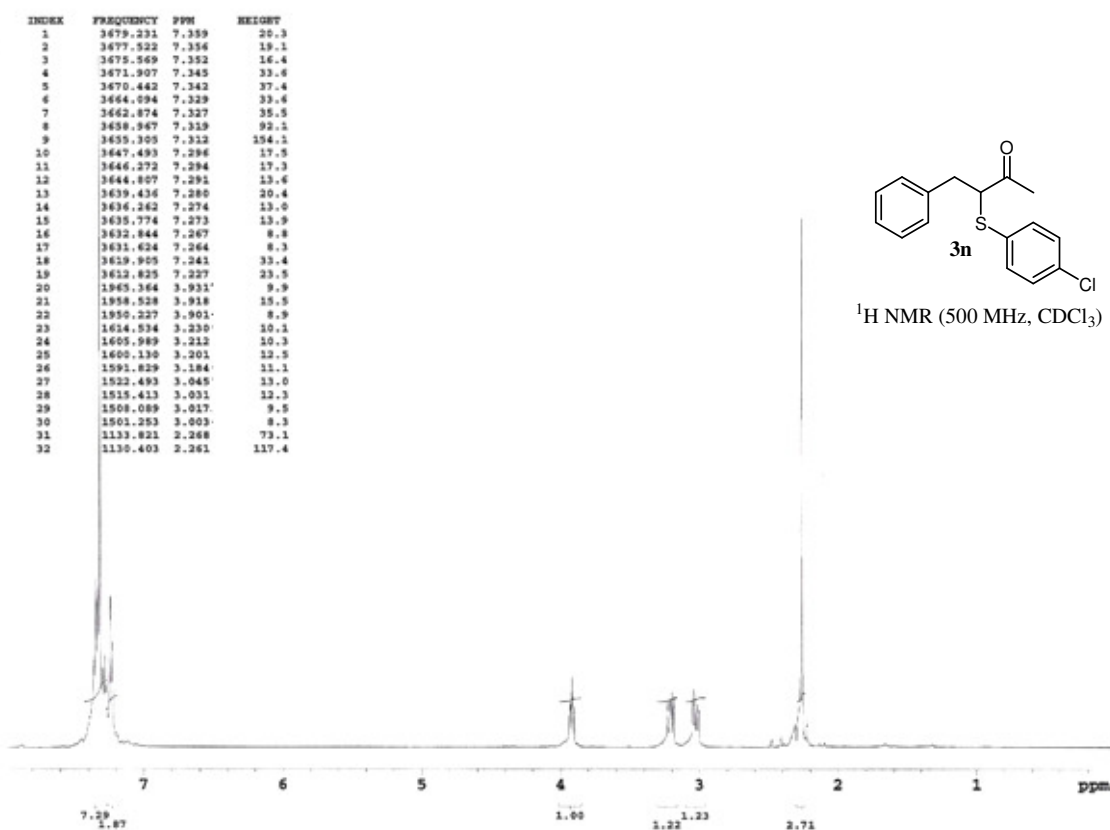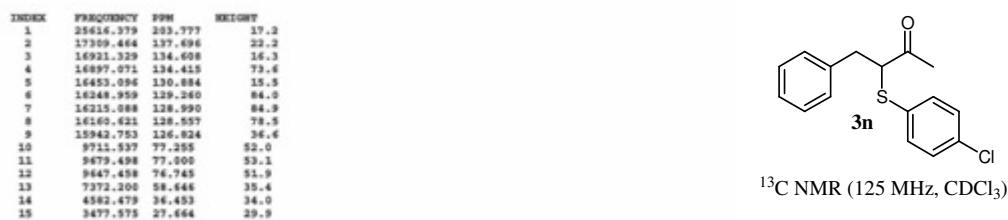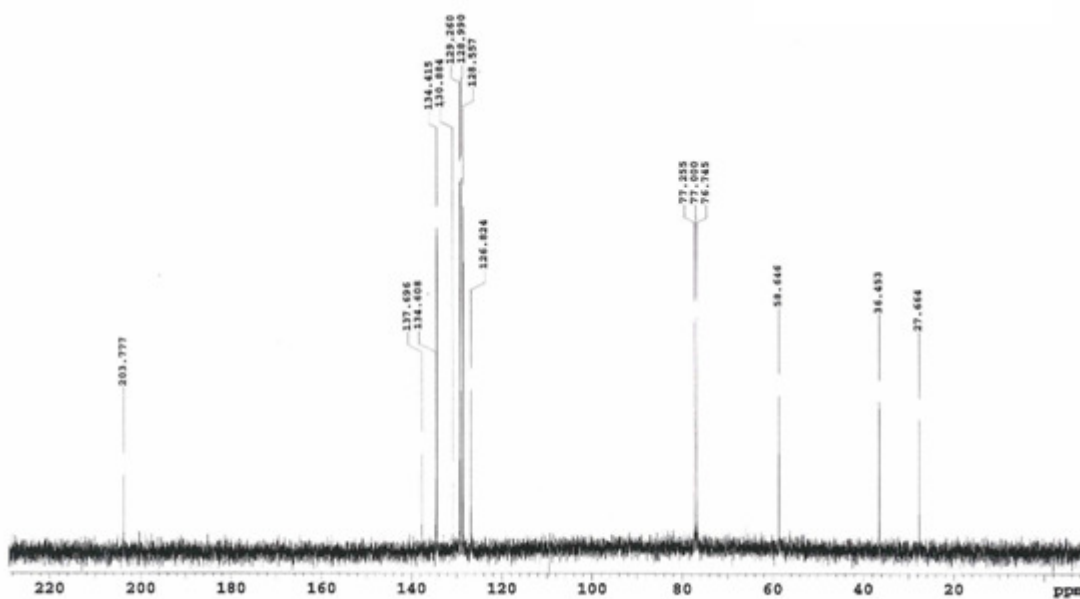

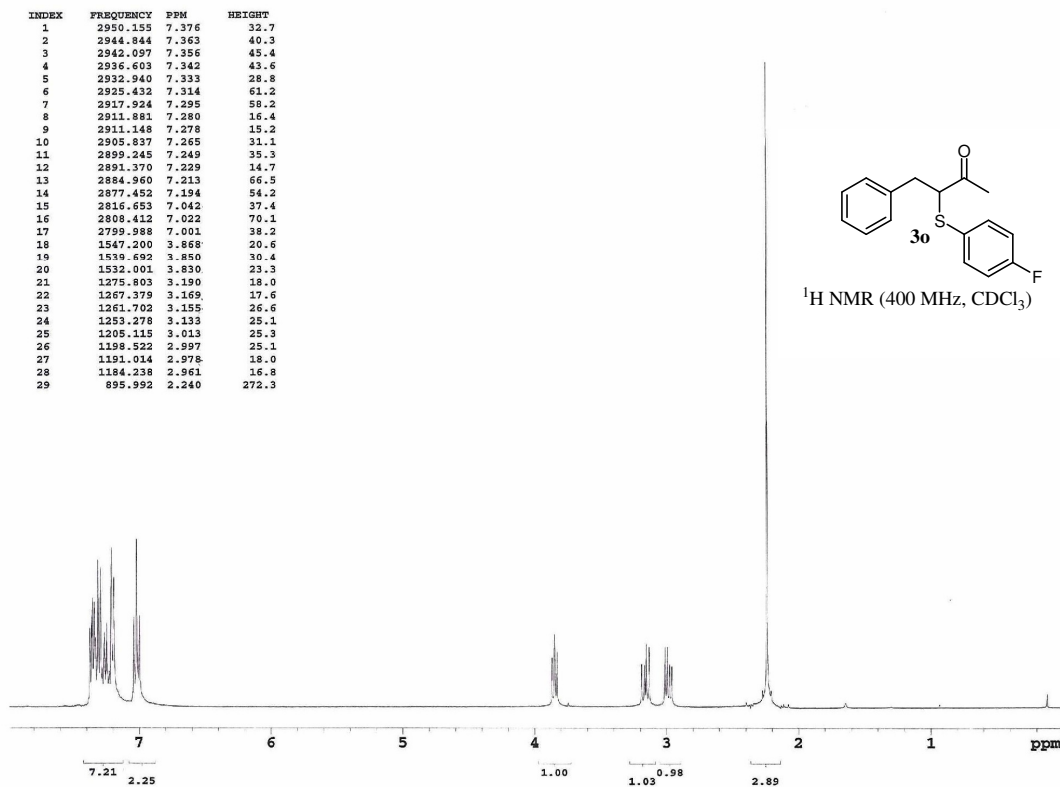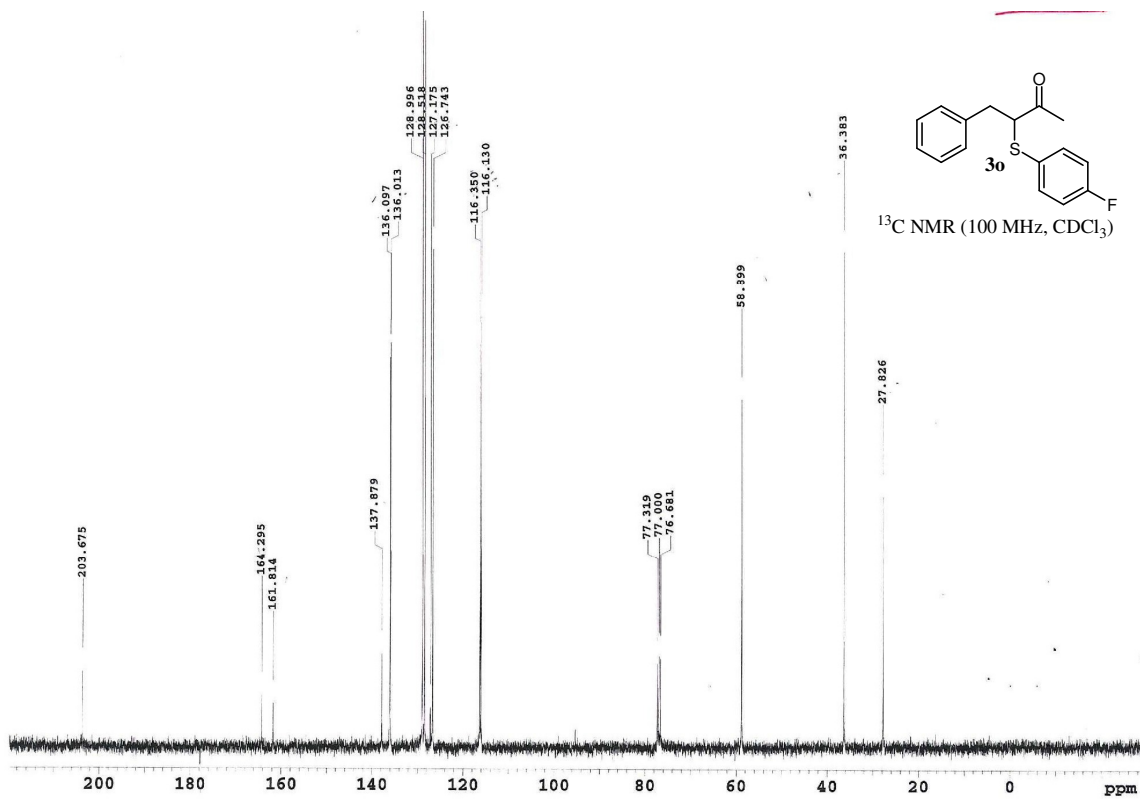

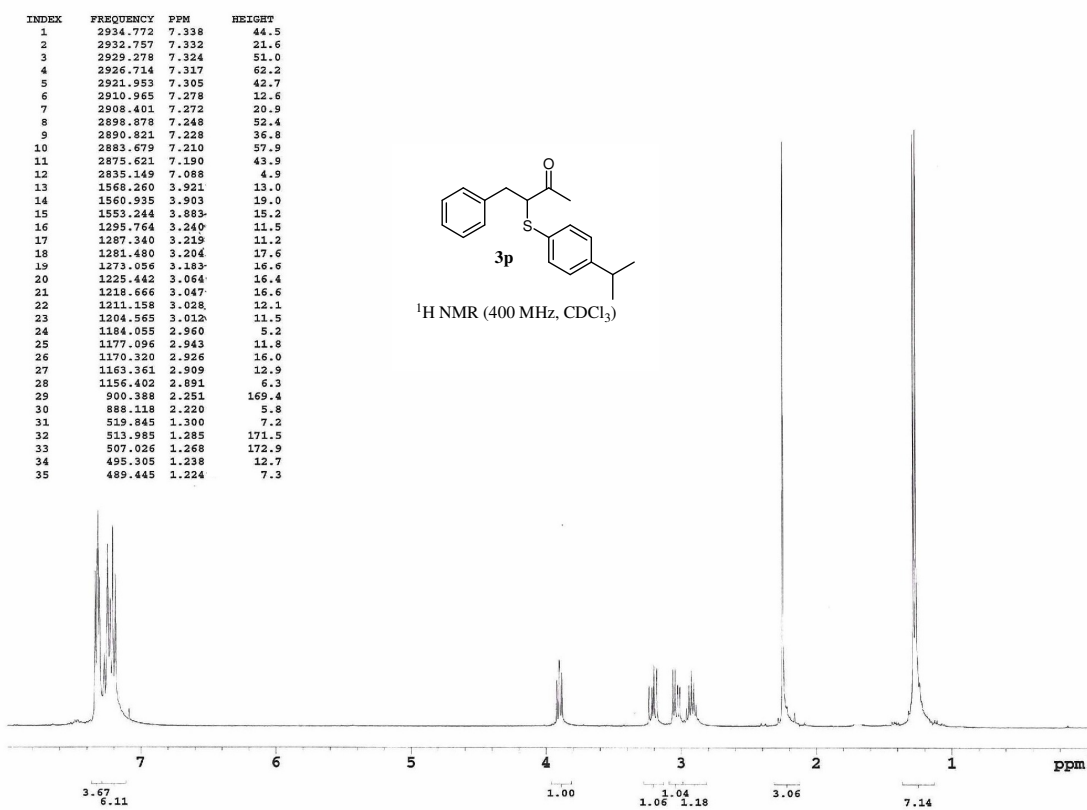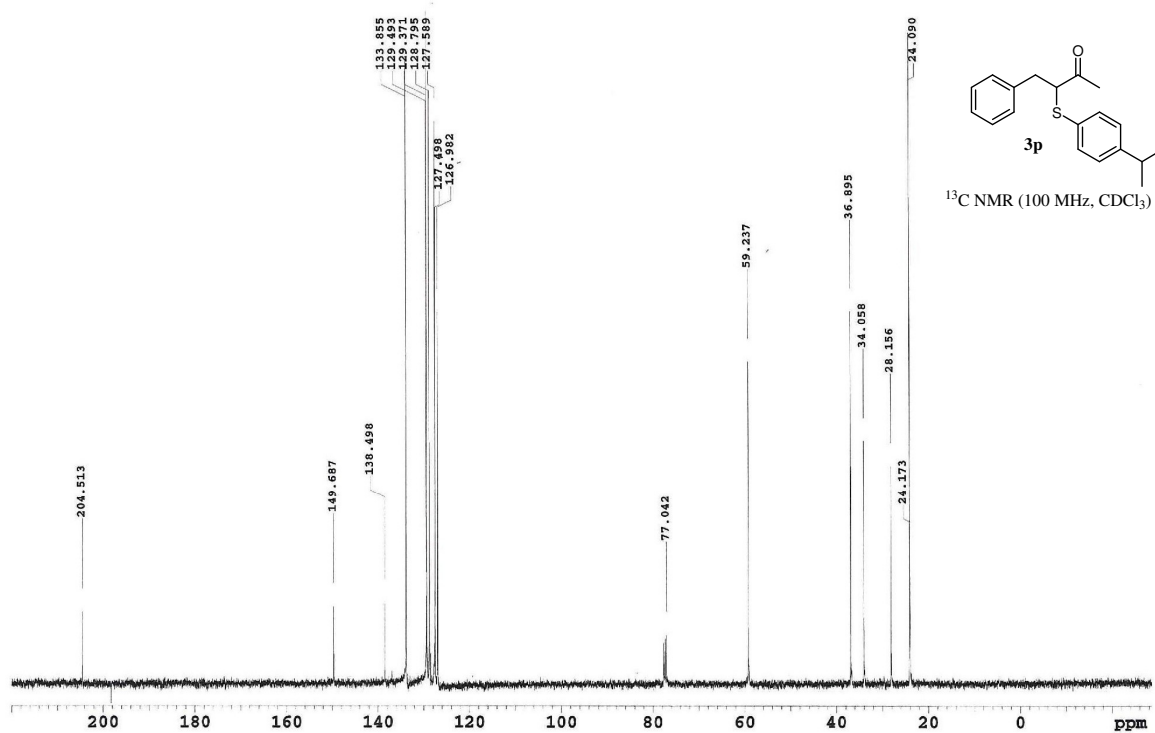



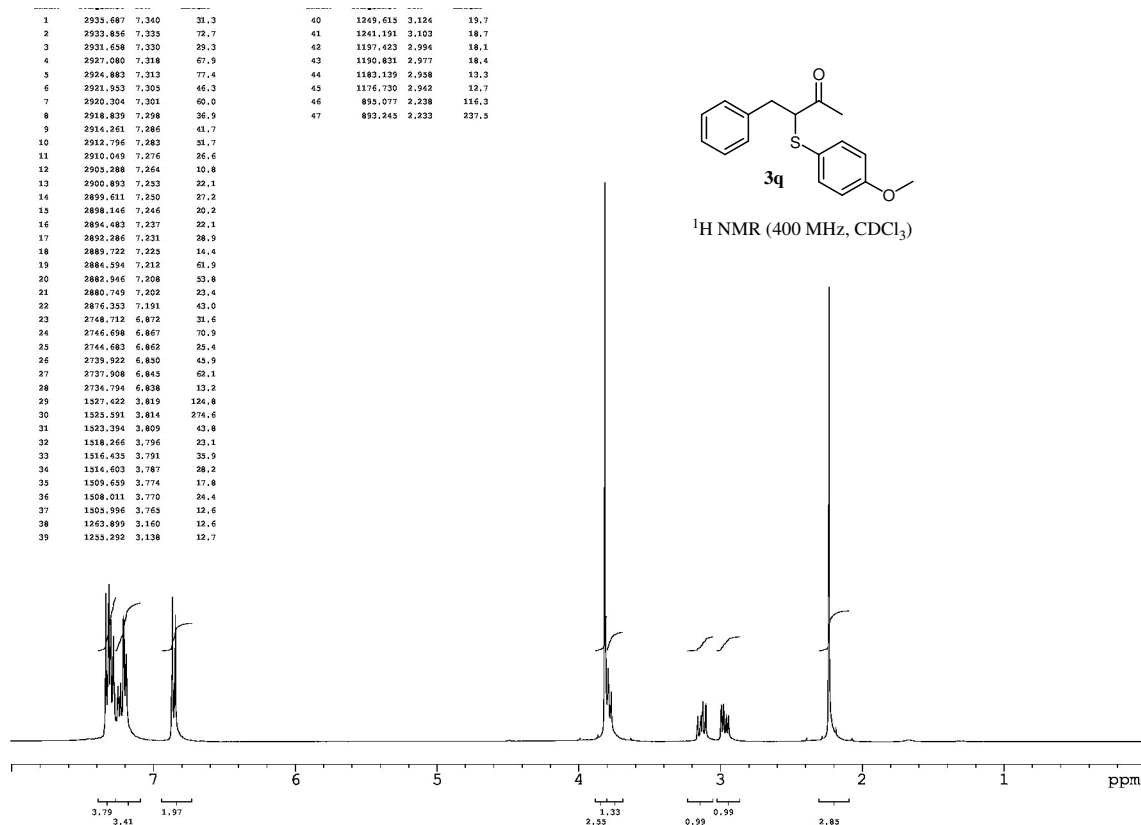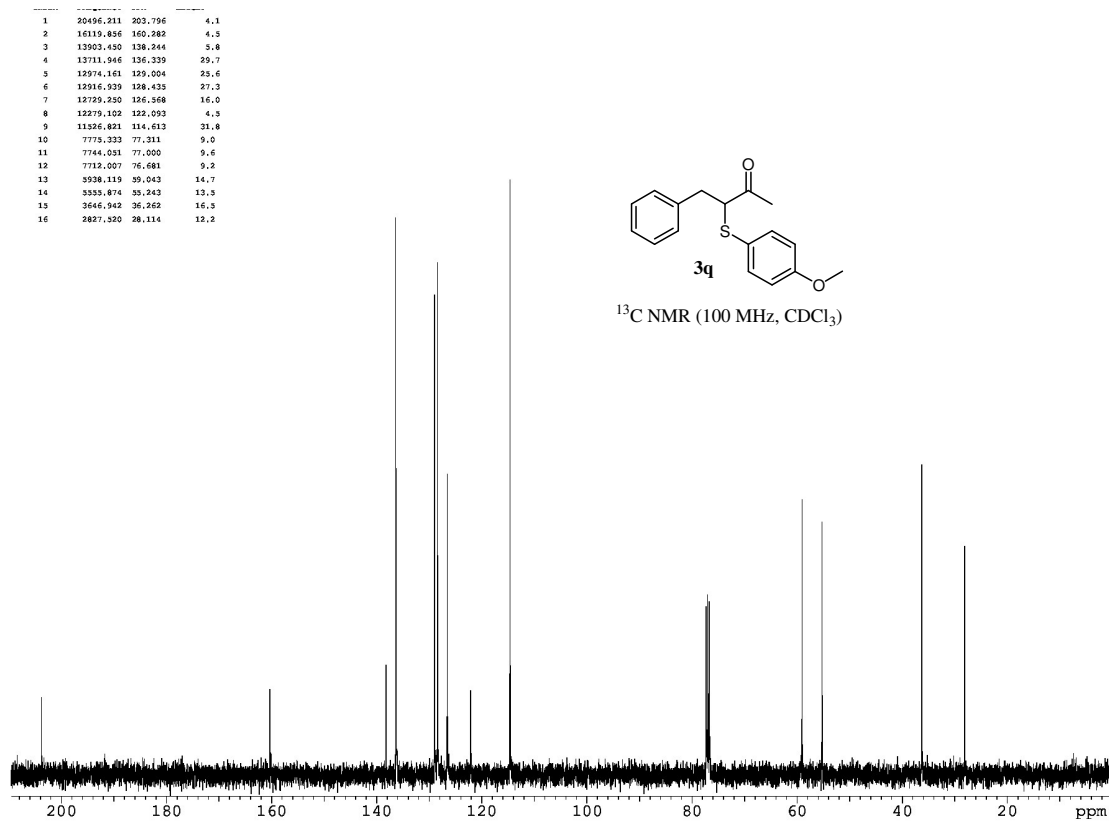

| INDEX | FREQUENCY | F1H   | INTEGR |
|-------|-----------|-------|--------|
| 1     | 2210.743  | 7.285 | 0.2    |
| 2     | 2216.051  | 7.288 | 7.5    |
| 3     | 2216.823  | 7.288 | 4.9    |
| 4     | 2214.543  | 7.281 | 4.6    |
| 5     | 2215.175  | 7.277 | 5.4    |
| 6     | 2213.463  | 7.274 | 7.4    |
| 7     | 2211.427  | 7.271 | 4.9    |
| 8     | 2210.885  | 7.268 | 10.2   |
| 9     | 2209.279  | 7.263 | 14.4   |
| 10    | 2207.189  | 7.257 | 4.9    |
| 11    | 2197.645  | 7.235 | 6.7    |
| 12    | 2189.742  | 7.218 | 4.2    |
| 13    | 2194.725  | 7.216 | 4.4    |
| 14    | 2193.184  | 7.210 | 14.4   |
| 15    | 2192.229  | 7.207 | 14.2   |
| 16    | 2193.897  | 7.201 | 7.4    |
| 17    | 2189.423  | 7.194 | 10.9   |
| 18    | 2187.897  | 7.189 | 11.8   |
| 19    | 2189.228  | 7.187 | 10.9   |
| 20    | 2185.845  | 7.183 | 10.2   |
| 21    | 2184.887  | 7.180 | 14.3   |
| 22    | 2182.893  | 7.176 | 10.9   |
| 23    | 2181.237  | 7.170 | 5.3    |
| 24    | 1593.846  | 1.877 | 3.8    |
| 25    | 1289.424  | 1.852 | 11.2   |
| 26    | 1287.895  | 1.846 | 6.3    |
| 27    | 877.926   | 1.240 | 11.4   |
| 28    | 862.283   | 1.201 | 3.3    |
| 29    | 394.574   | 1.235 | 7.9    |
| 30    | 397.834   | 1.253 | 7.4    |
| 31    | 322.789   | 1.076 | 4.4    |
| 32    | 315.460   | 1.051 | 9.4    |
| 33    | 308.274   | 1.027 | 4.9    |
| 34    | 294.488   | 0.982 | 10.7   |
| 35    | 287.330   | 0.959 | 55.1   |
| 36    | 282.469   | 0.933 | 14.2   |

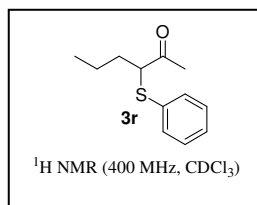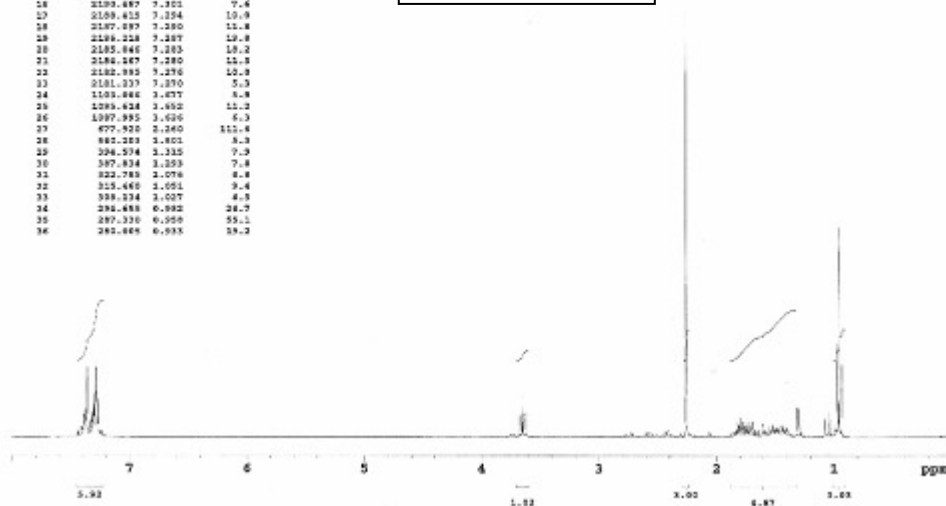

| INDEX | FREQUENCY | F1H   | INTEGR |
|-------|-----------|-------|--------|
| 1     | 2050.290  | 7.285 | 0.2    |
| 2     | 2050.000  | 7.288 | 7.5    |
| 3     | 2050.772  | 7.288 | 4.9    |
| 4     | 2048.492  | 7.281 | 4.6    |
| 5     | 2049.124  | 7.277 | 5.4    |
| 6     | 2047.412  | 7.274 | 7.4    |
| 7     | 2045.376  | 7.271 | 4.9    |
| 8     | 2044.834  | 7.268 | 10.2   |
| 9     | 2043.228  | 7.263 | 14.4   |
| 10    | 2041.138  | 7.257 | 4.9    |
| 11    | 1931.594  | 7.235 | 6.7    |
| 12    | 1923.691  | 7.218 | 4.2    |
| 13    | 1928.674  | 7.216 | 4.4    |
| 14    | 1927.133  | 7.210 | 14.4   |
| 15    | 1926.178  | 7.207 | 14.2   |
| 16    | 1927.846  | 7.201 | 7.4    |
| 17    | 1923.372  | 7.194 | 10.9   |
| 18    | 1921.846  | 7.189 | 11.8   |
| 19    | 1923.177  | 7.187 | 10.9   |
| 20    | 1919.794  | 7.183 | 10.2   |
| 21    | 1918.836  | 7.180 | 14.3   |
| 22    | 1916.842  | 7.176 | 10.9   |
| 23    | 1915.186  | 7.170 | 5.3    |
| 24    | 1321.795  | 1.877 | 3.8    |
| 25    | 1017.373  | 1.852 | 11.2   |
| 26    | 1015.844  | 1.846 | 6.3    |
| 27    | 605.875   | 1.240 | 11.4   |
| 28    | 590.232   | 1.201 | 3.3    |
| 29    | 122.523   | 1.235 | 7.9    |
| 30    | 125.783   | 1.253 | 7.4    |
| 31    | 52.738    | 1.076 | 4.4    |
| 32    | 45.409    | 1.051 | 9.4    |
| 33    | 38.223    | 1.027 | 4.9    |
| 34    | 24.437    | 0.982 | 10.7   |
| 35    | 17.279    | 0.959 | 55.1   |
| 36    | 12.418    | 0.933 | 14.2   |

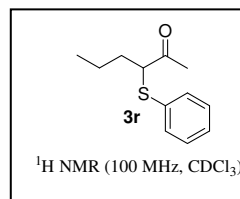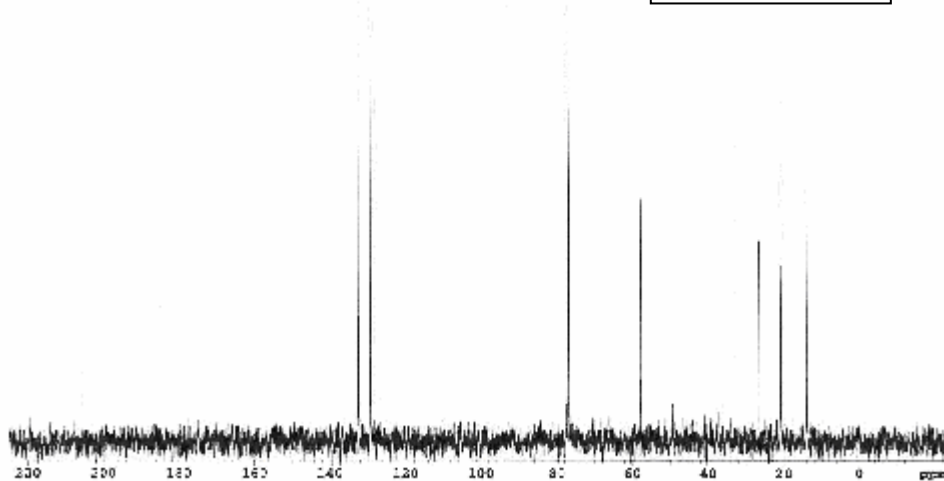

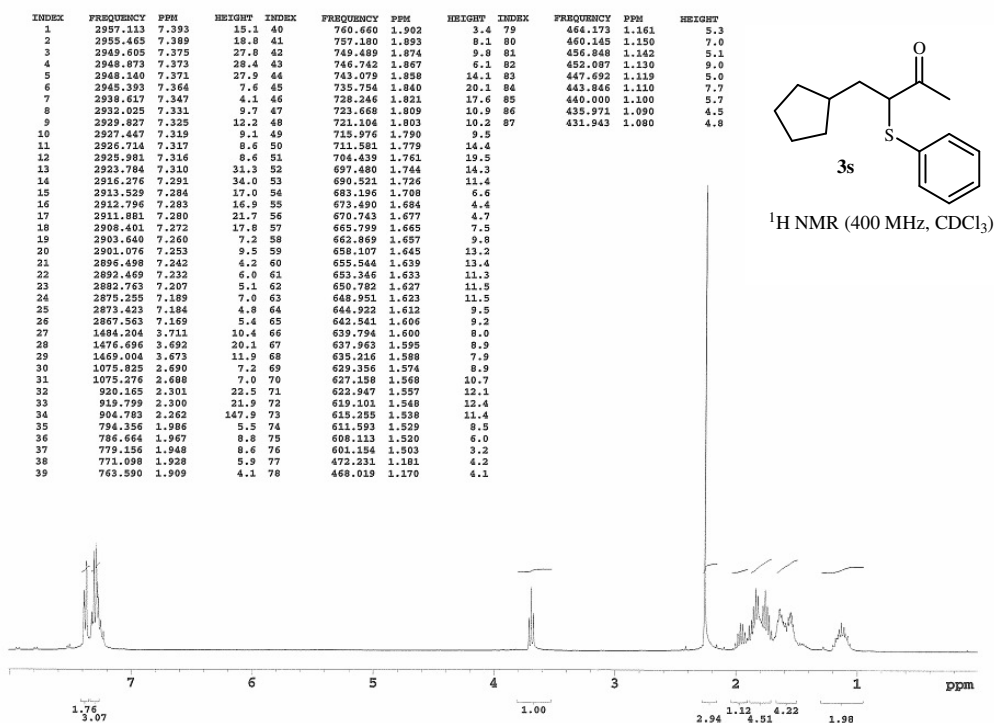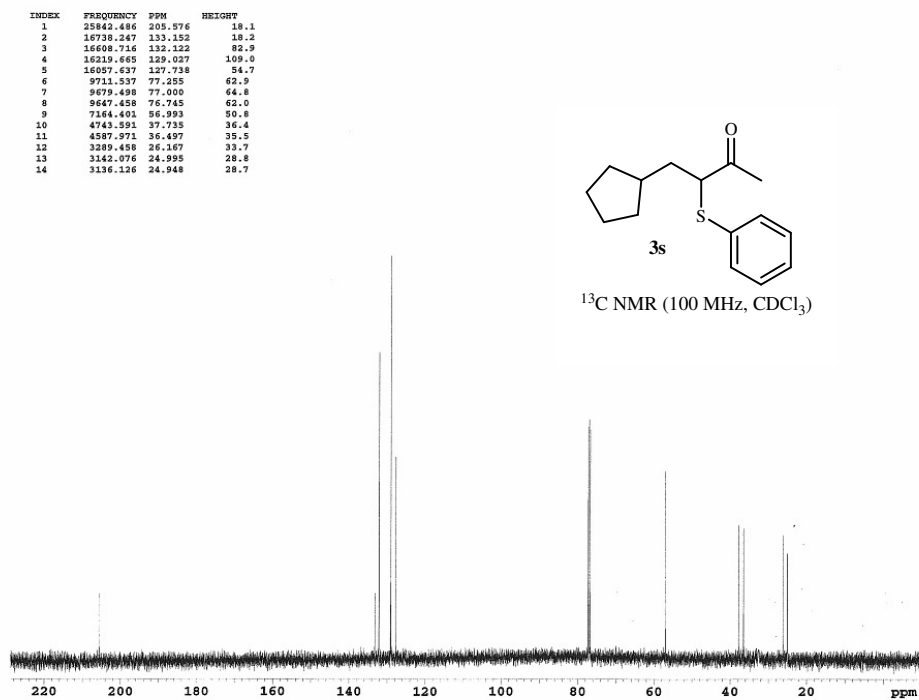

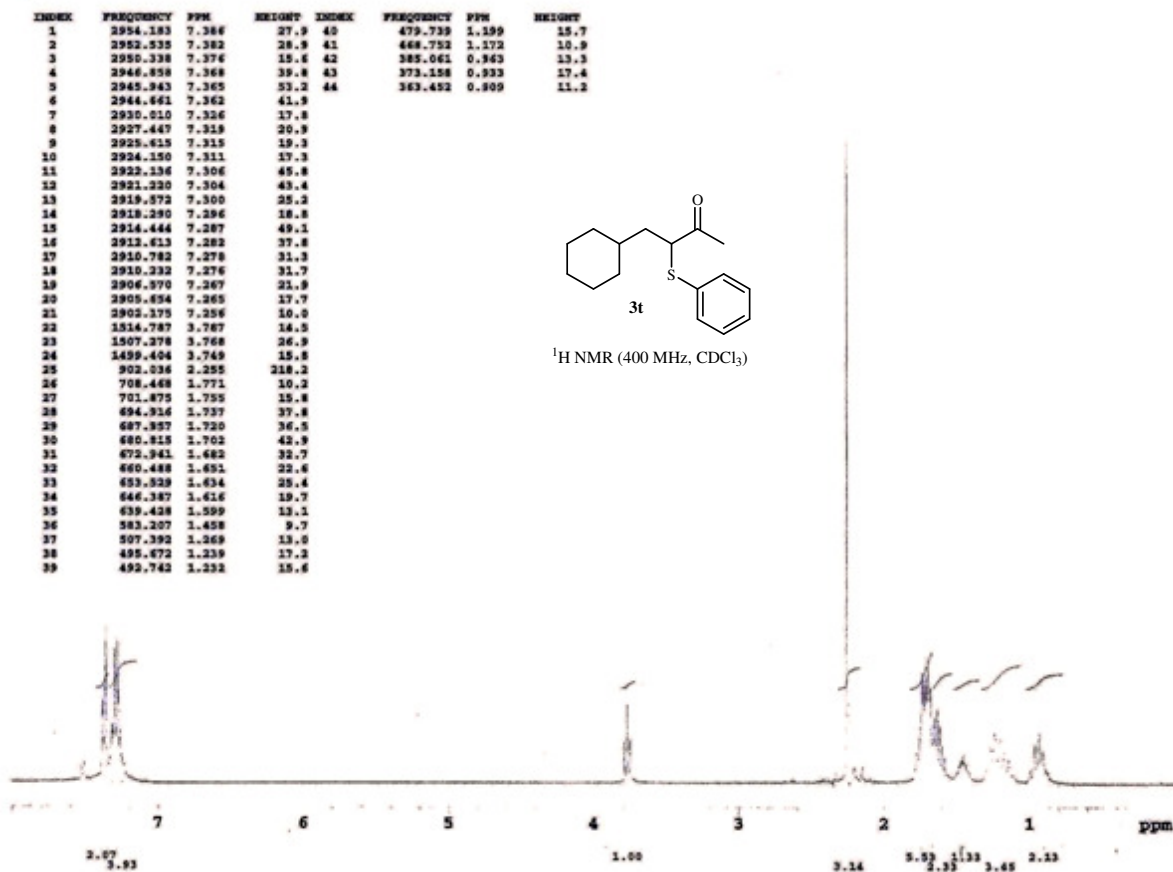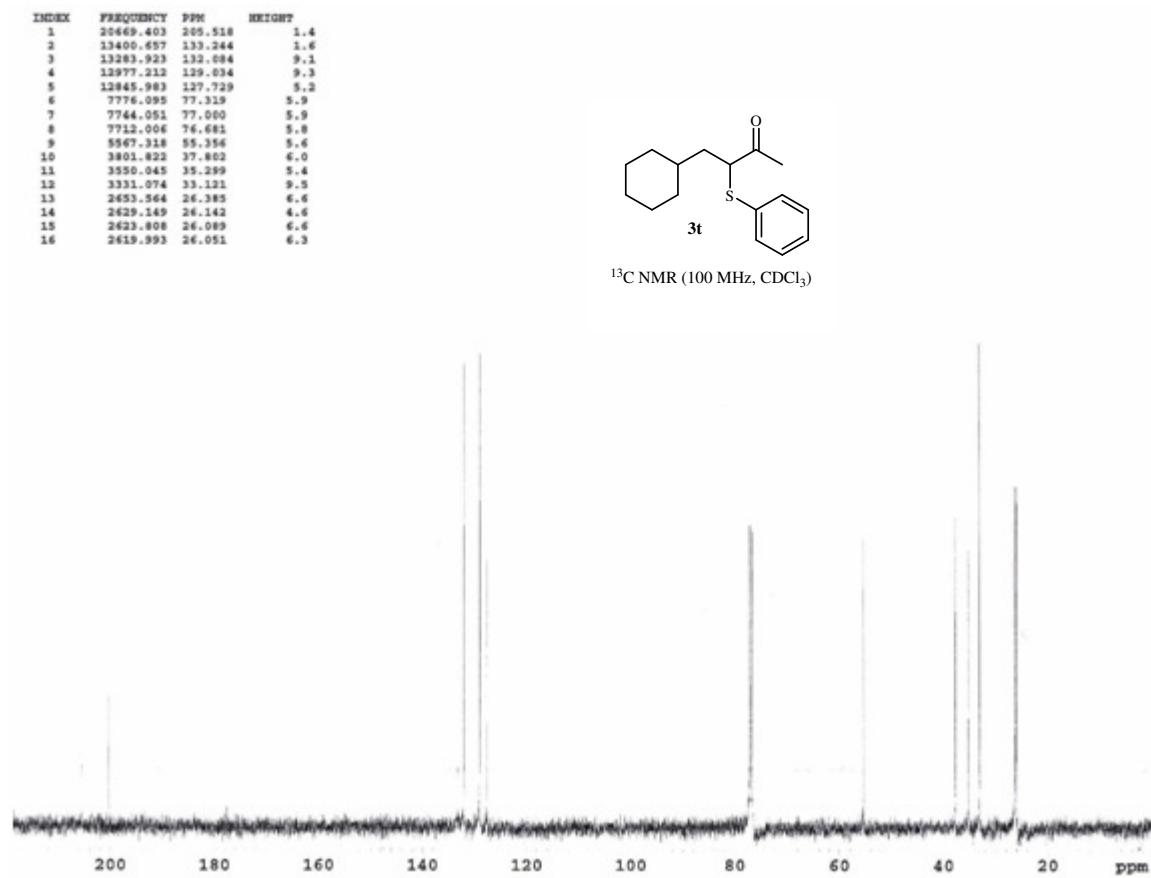

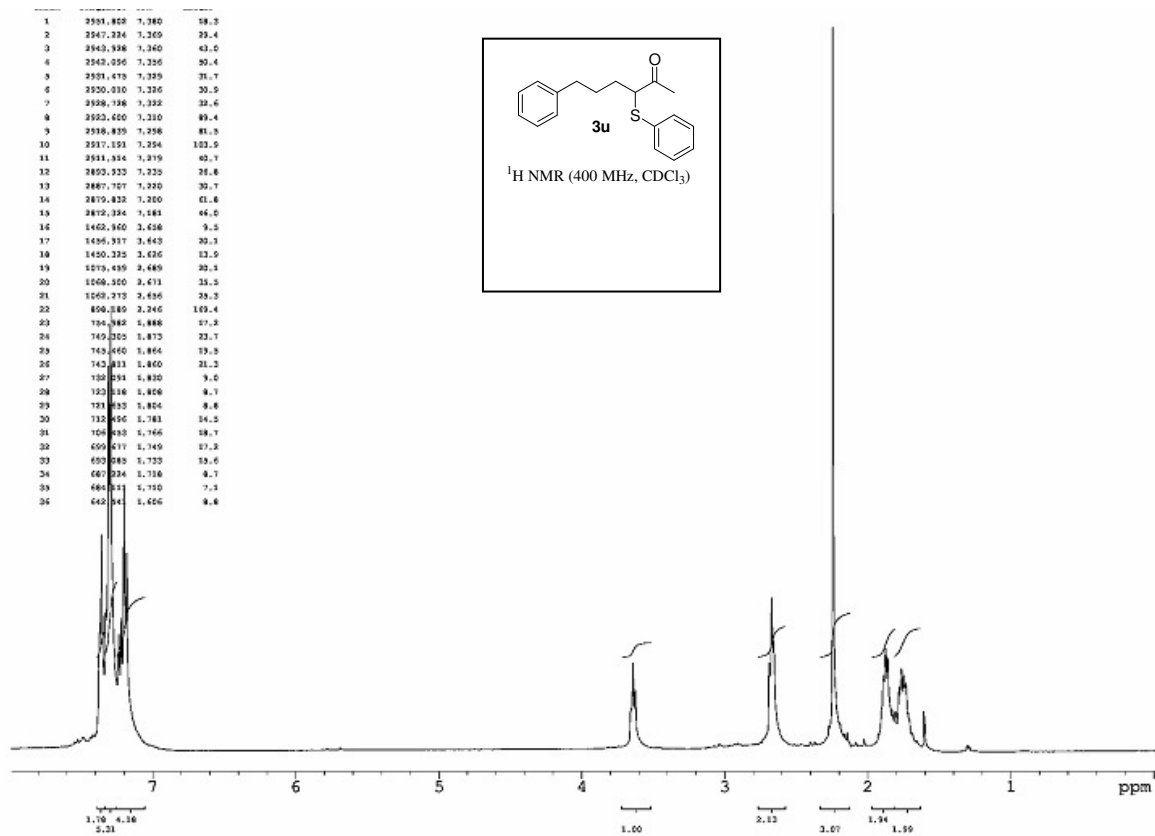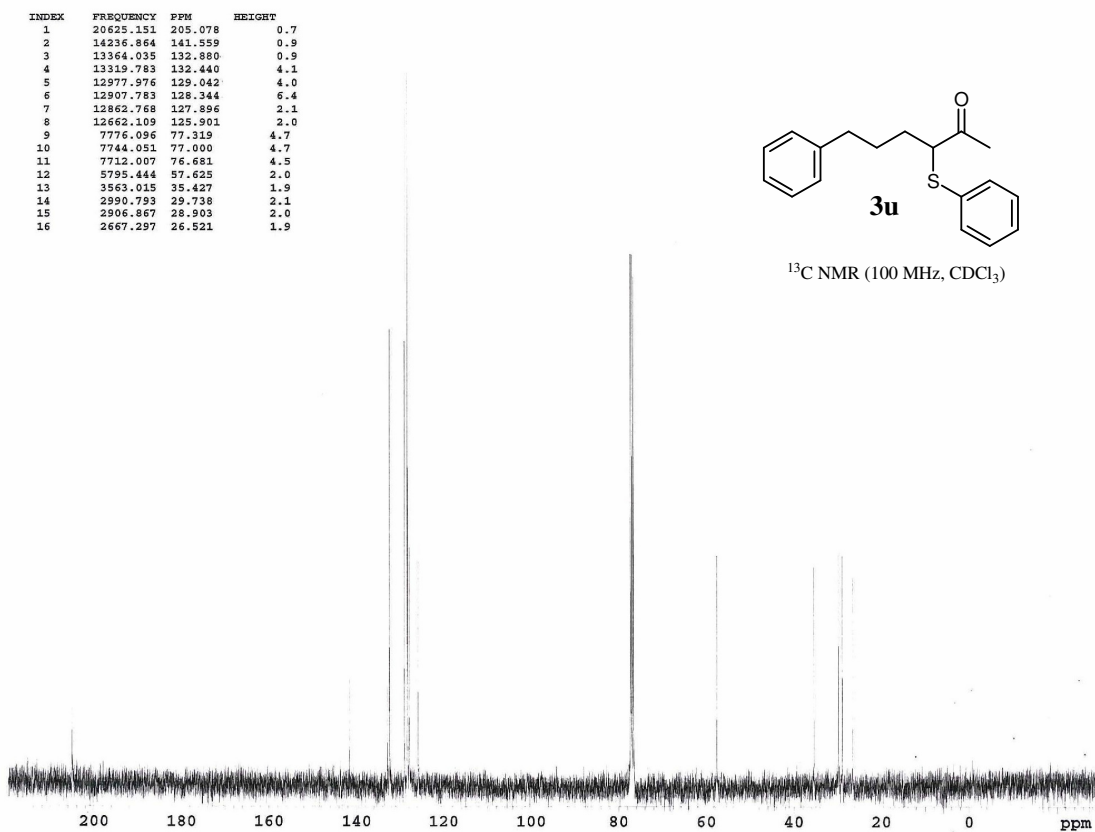

### I. Copies of NMR spectra of isolated intermediate 4.

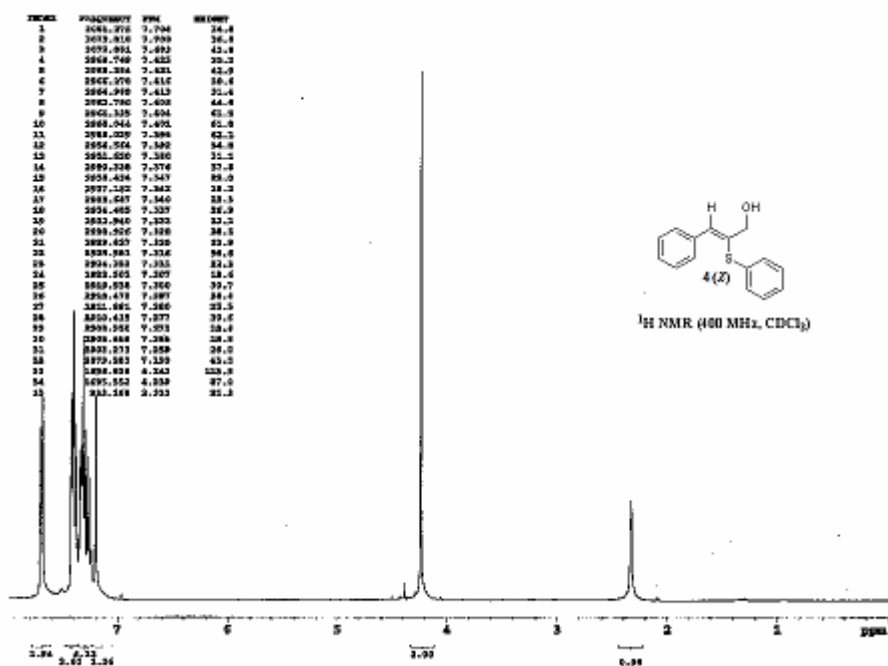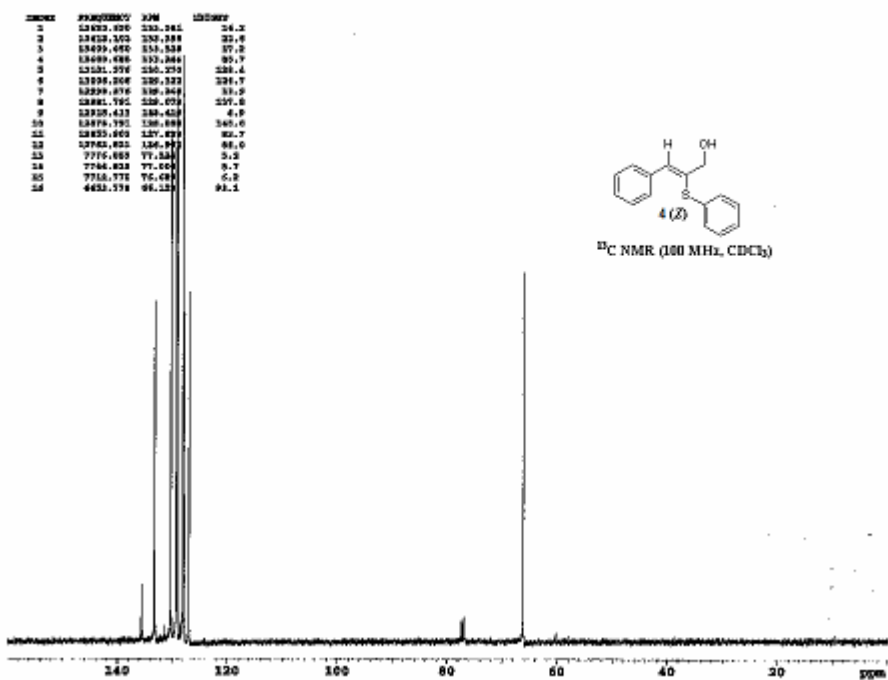

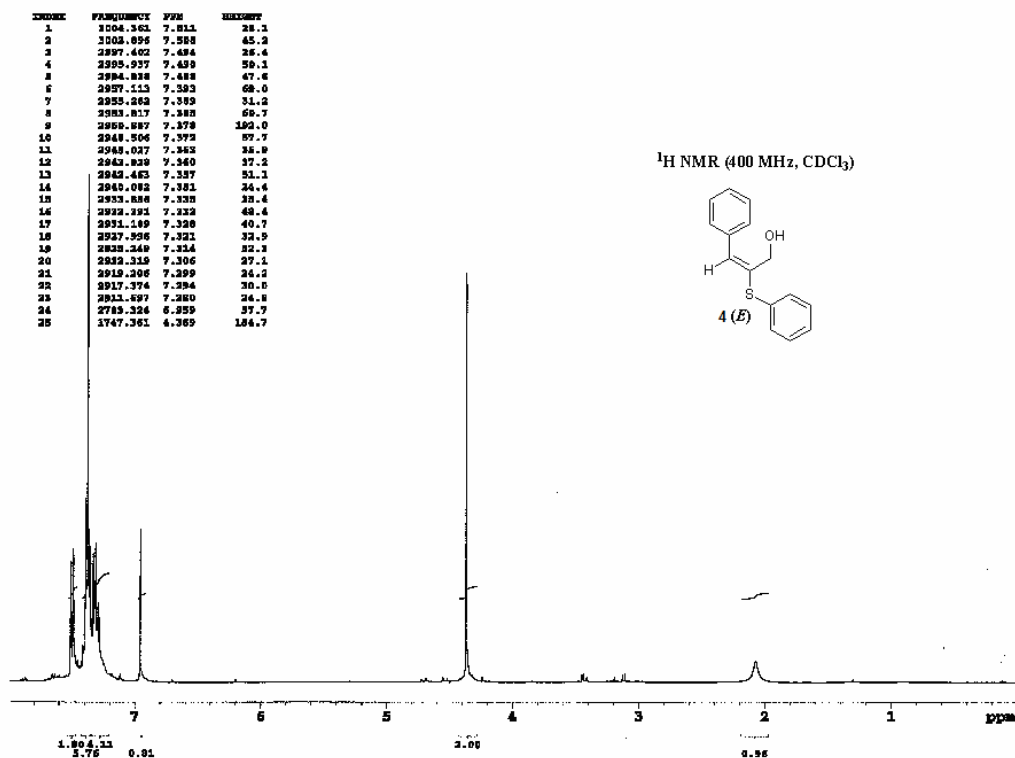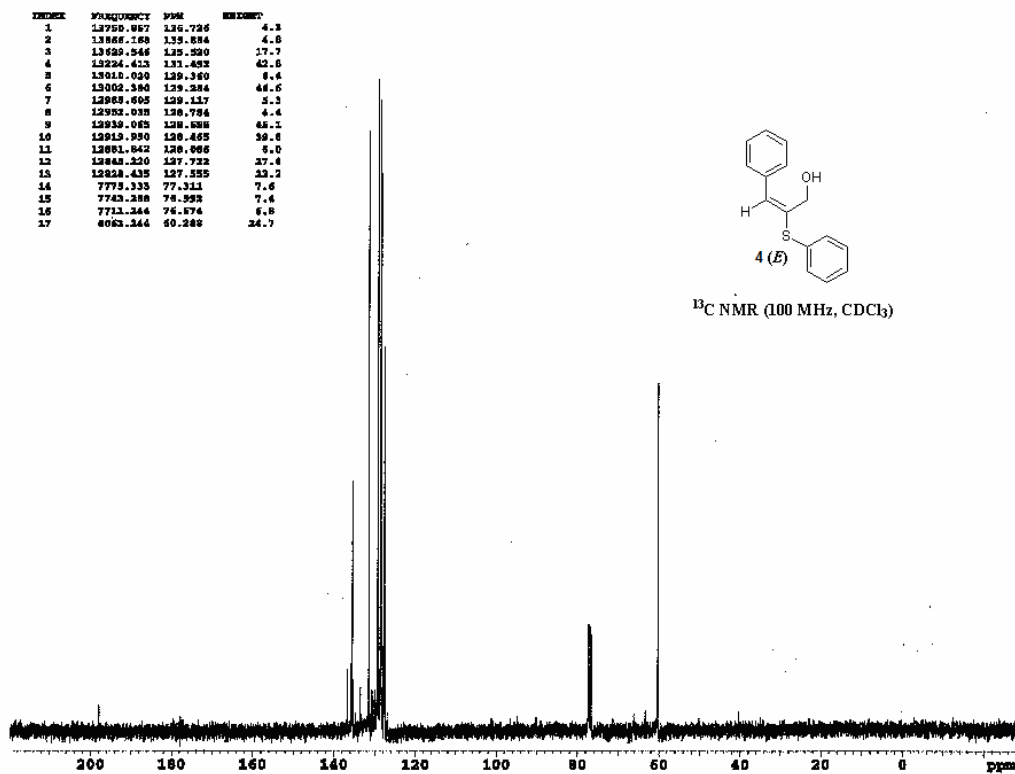

**J. References.**

1 S. Biswas and J. S. M. Samec, *Chem. Commun.*, 2012, **48**, 6586.

2 T. Aoyama, T. Takido and M. Kodomari, *Synlett*, 2005, 2739.
